# Supplementary material
Source: PubMed Central journal article supplement (PMC3691720)

SUPPORTING INFORMATION

**Carbofluoresceins and Carborhodamines as Scaffolds for High-  
Contrast Fluorogenic Probes**

Jonathan B. Grimm, Andrew J. Sung, Wesley R. Legant, Phuson Hulamm, Sylwia M. Matlosz, Eric Betzig, and  
Luke D. Lavis\*

*Janelia Farm Research Campus, Howard Hughes Medical Institute,  
Ashburn, VA 20147*

Email: [lavisl@janelia.hhmi.org](mailto:lavisl@janelia.hhmi.org)

---

**S2: Characterization Spectra (NMR, HPLC)**

Origin Bruker BioSpin GmbH  
 Solvent CDCl3  
 Pulse Sequence zg30  
 Experiment 1D  
 Number of Scans 16  
 Acquisition Date 2011-05-04T10:45:00  
 Spectrometer Frequency 400.13  
 Spectral Width 8223.7  
 Lowest Frequency -1648.6  
 Nucleus 1H  
 Acquired Size 32768  
 Spectral Size 32768

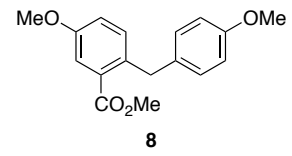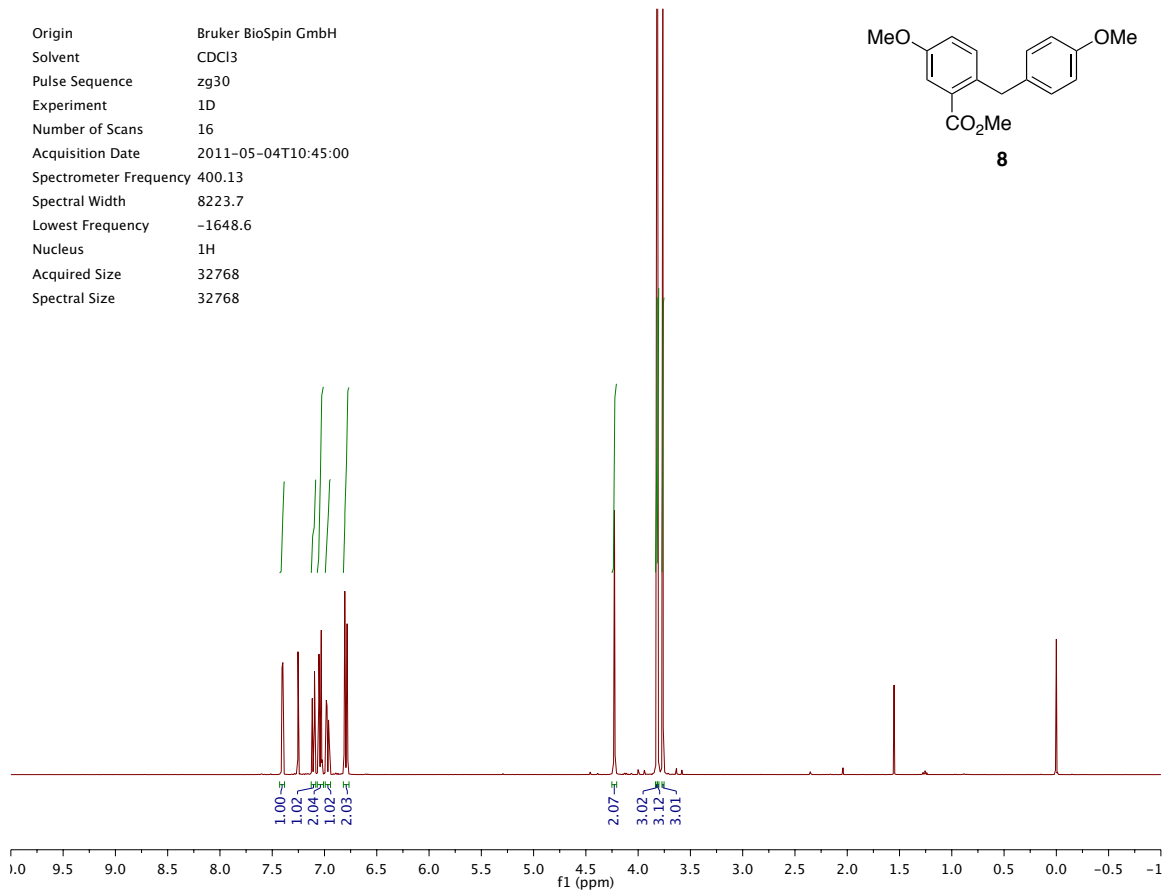

Origin Bruker BioSpin GmbH  
 Solvent CDCl3  
 Pulse Sequence zgpg30  
 Experiment 1D  
 Number of Scans 512  
 Acquisition Date 2011-07-11T16:41:00  
 Spectrometer Frequency 100.62  
 Spectral Width 24038.5  
 Lowest Frequency -1944.3  
 Nucleus 13C  
 Acquired Size 32768  
 Spectral Size 32768

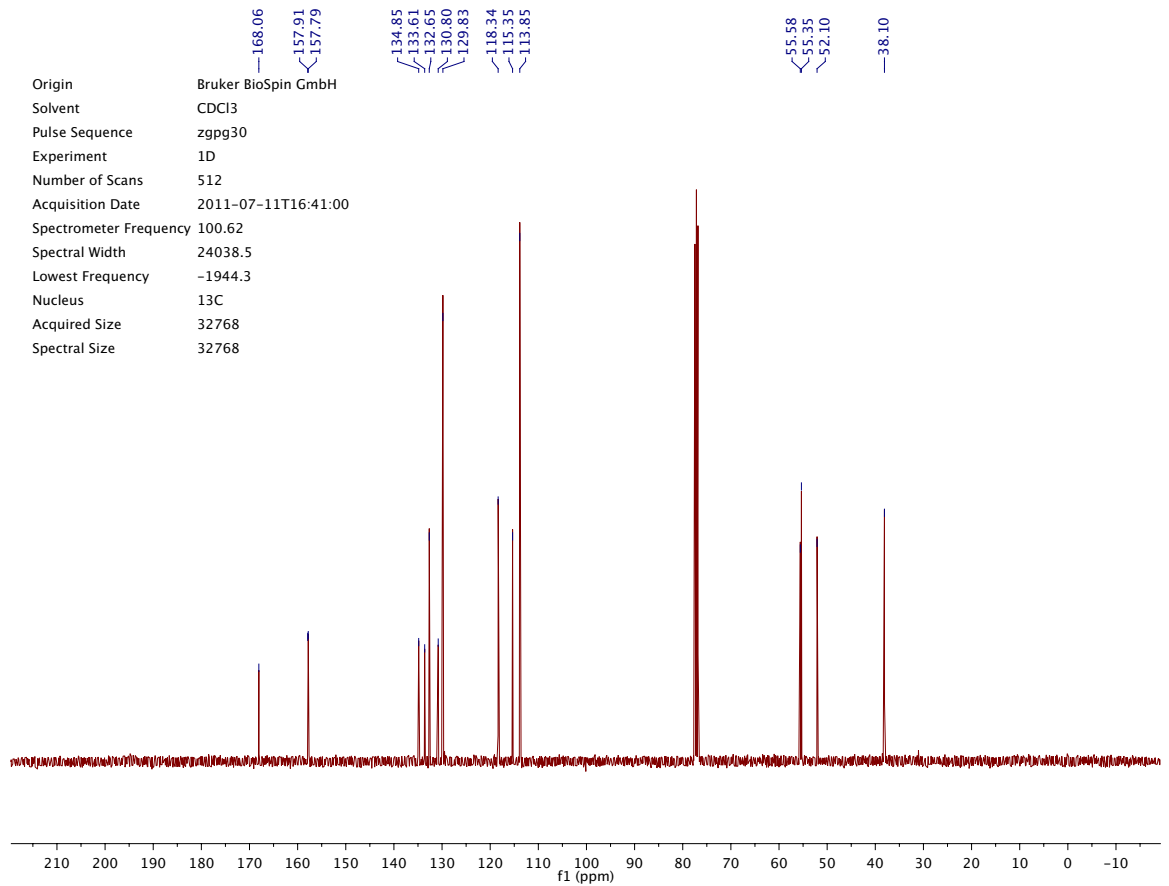

Origin Bruker BioSpin GmbH  
 Solvent CDCl3  
 Pulse Sequence zg30  
 Experiment 1D  
 Number of Scans 16  
 Acquisition Date 2011-07-12T09:05:00  
 Spectrometer Frequency 400.13  
 Spectral Width 8223.7  
 Lowest Frequency -1648.7  
 Nucleus 1H  
 Acquired Size 32768  
 Spectral Size 32768

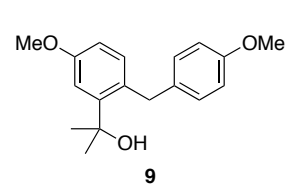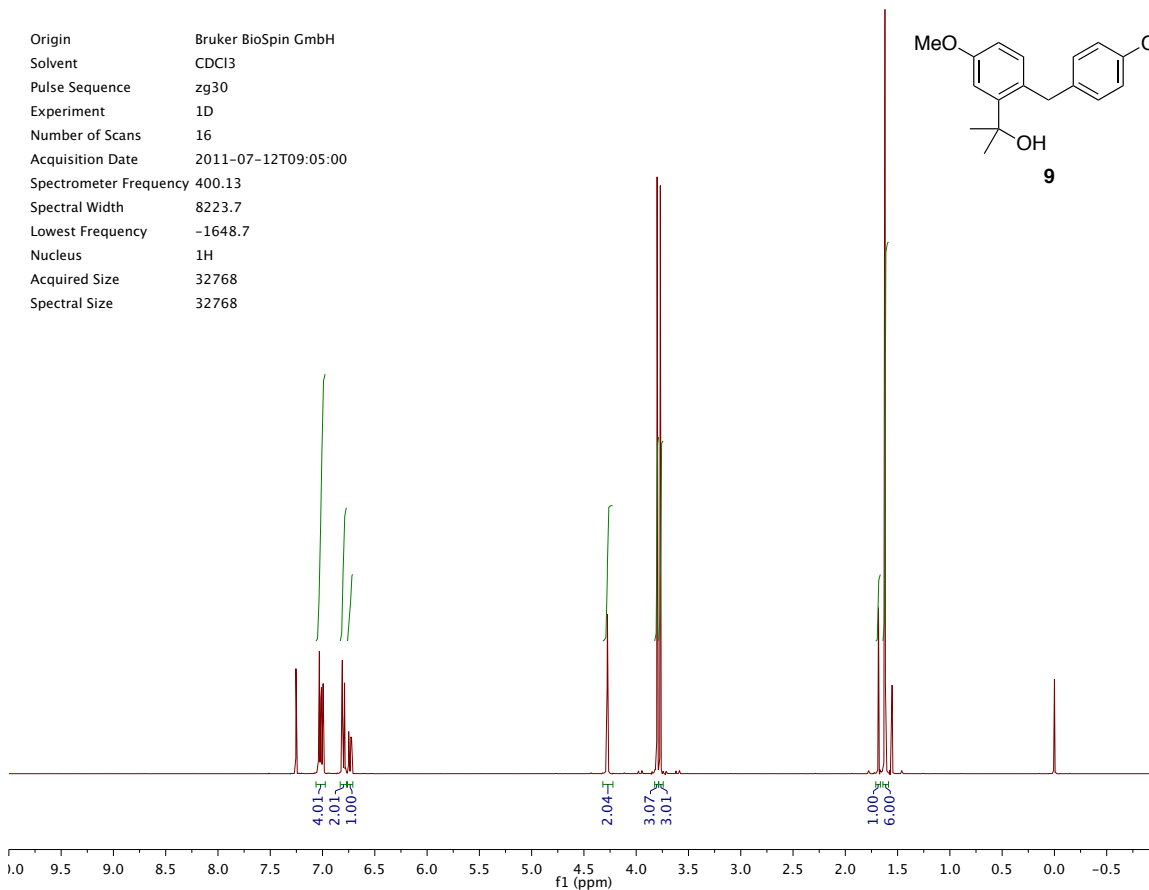

Origin Bruker BioSpin GmbH  
 Solvent CDCl3  
 Pulse Sequence zgpg30  
 Experiment 1D  
 Number of Scans 1024  
 Acquisition Date 2011-07-11T14:35:00  
 Spectrometer Frequency 100.62  
 Spectral Width 24038.5  
 Lowest Frequency -1947.2  
 Nucleus 13C  
 Acquired Size 32768  
 Spectral Size 32768

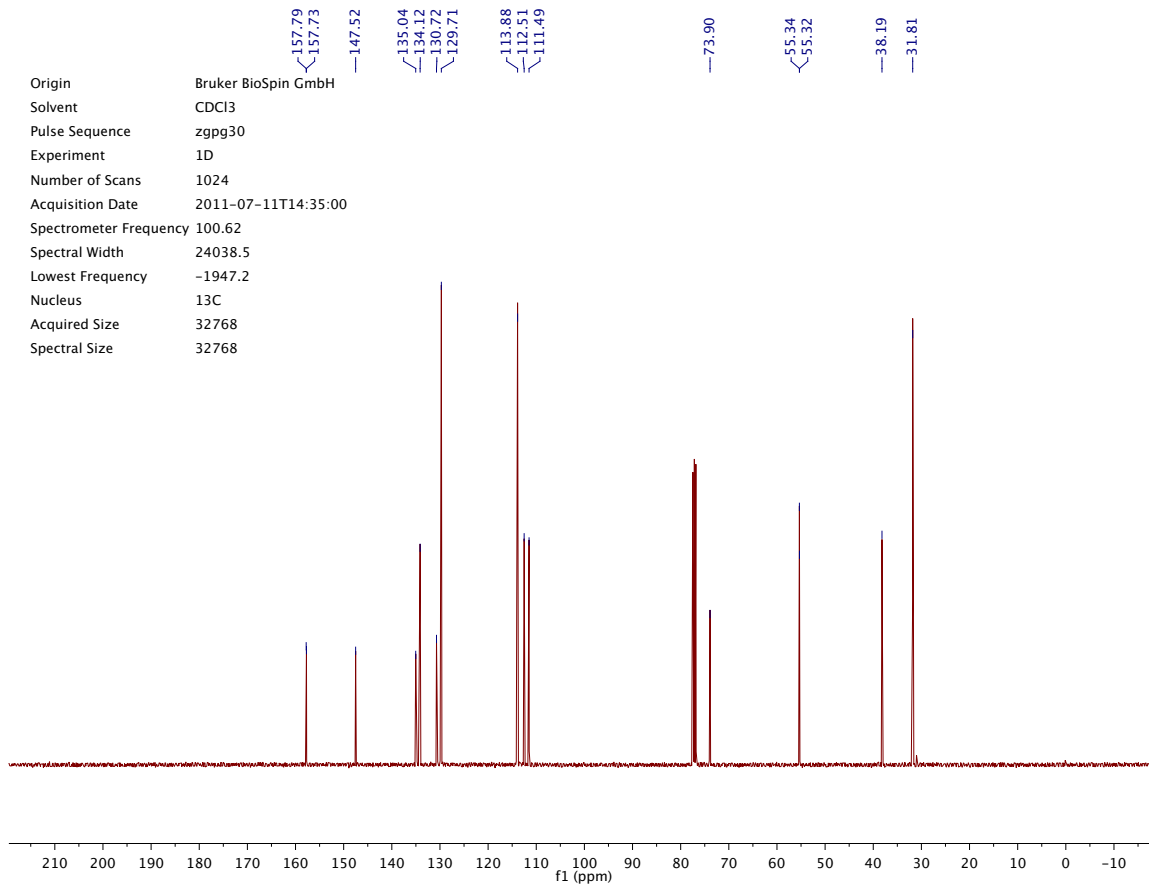

Origin Bruker BioSpin GmbH  
 Solvent DMSO  
 Pulse Sequence zg30  
 Experiment 1D  
 Number of Scans 16  
 Acquisition Date 2011-07-18T08:46:00  
 Spectrometer Frequency 400.13  
 Spectral Width 8223.7  
 Lowest Frequency -1638.5  
 Nucleus 1H  
 Acquired Size 32768  
 Spectral Size 32768

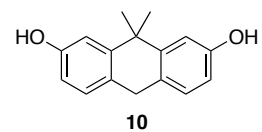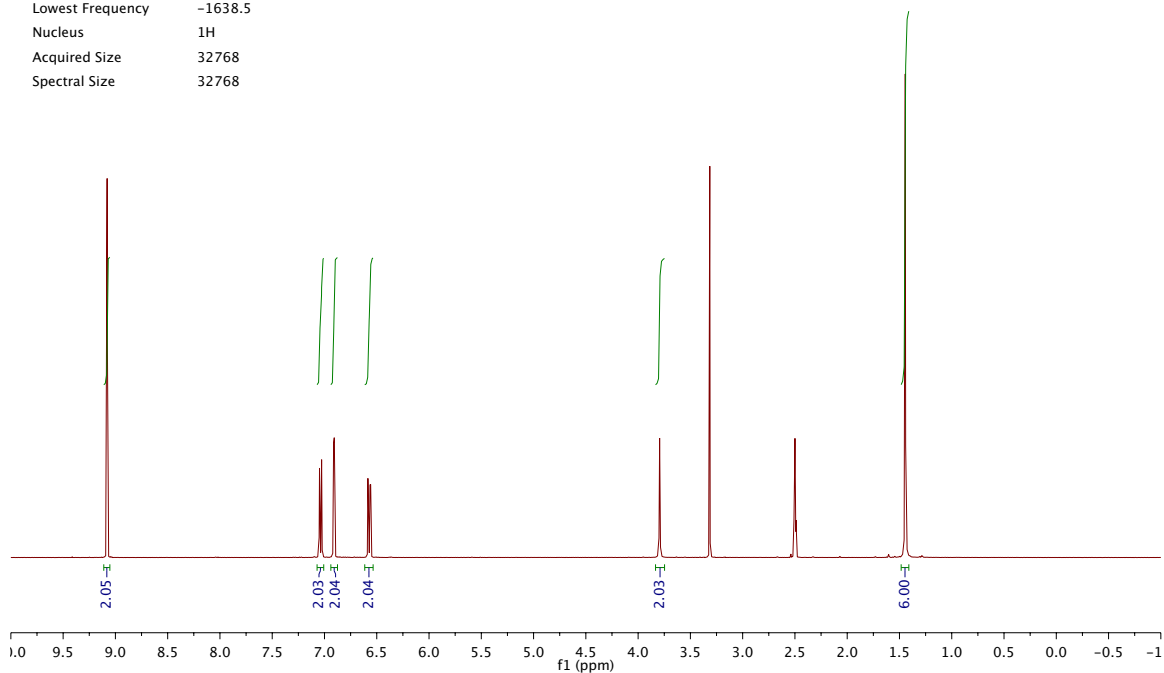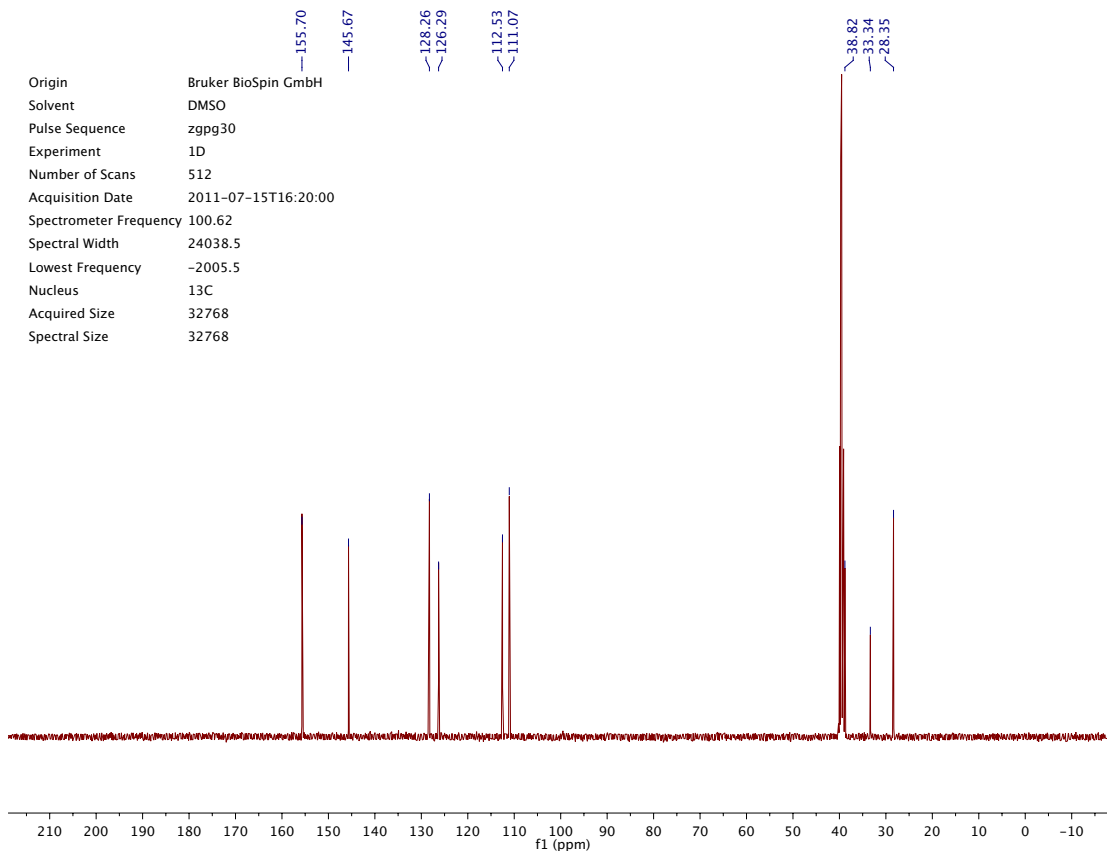

Origin Bruker BioSpin GmbH  
 Solvent DMSO  
 Pulse Sequence zgpg30  
 Experiment 1D  
 Number of Scans 512  
 Acquisition Date 2011-07-15T16:20:00  
 Spectrometer Frequency 100.62  
 Spectral Width 24038.5  
 Lowest Frequency -2005.5  
 Nucleus 13C  
 Acquired Size 32768  
 Spectral Size 32768

Origin Bruker BioSpin GmbH  
 Solvent DMSO  
 Pulse Sequence zg30  
 Experiment 1D  
 Number of Scans 16  
 Acquisition Date 2011-07-18T08:51:00  
 Spectrometer Frequency 400.13  
 Spectral Width 8223.7  
 Lowest Frequency -1638.5  
 Nucleus 1H  
 Acquired Size 32768  
 Spectral Size 32768

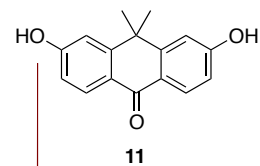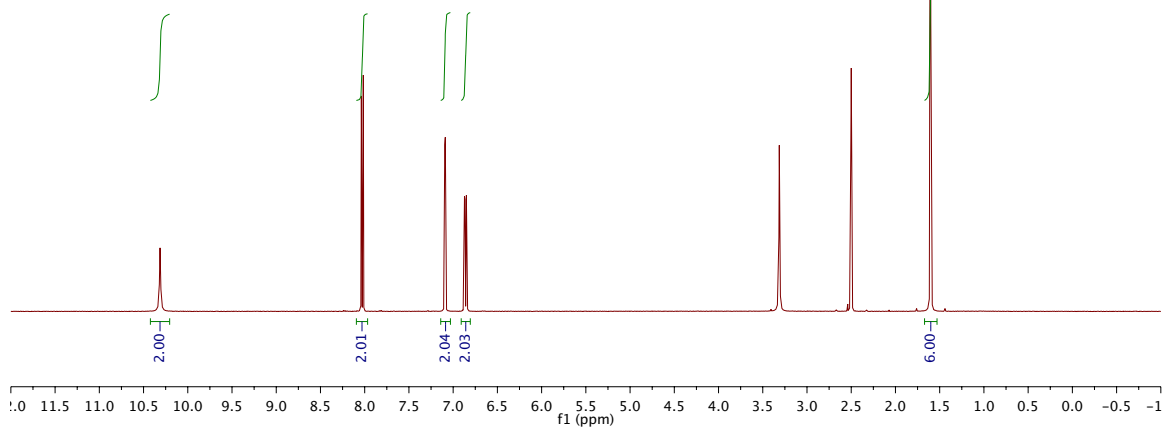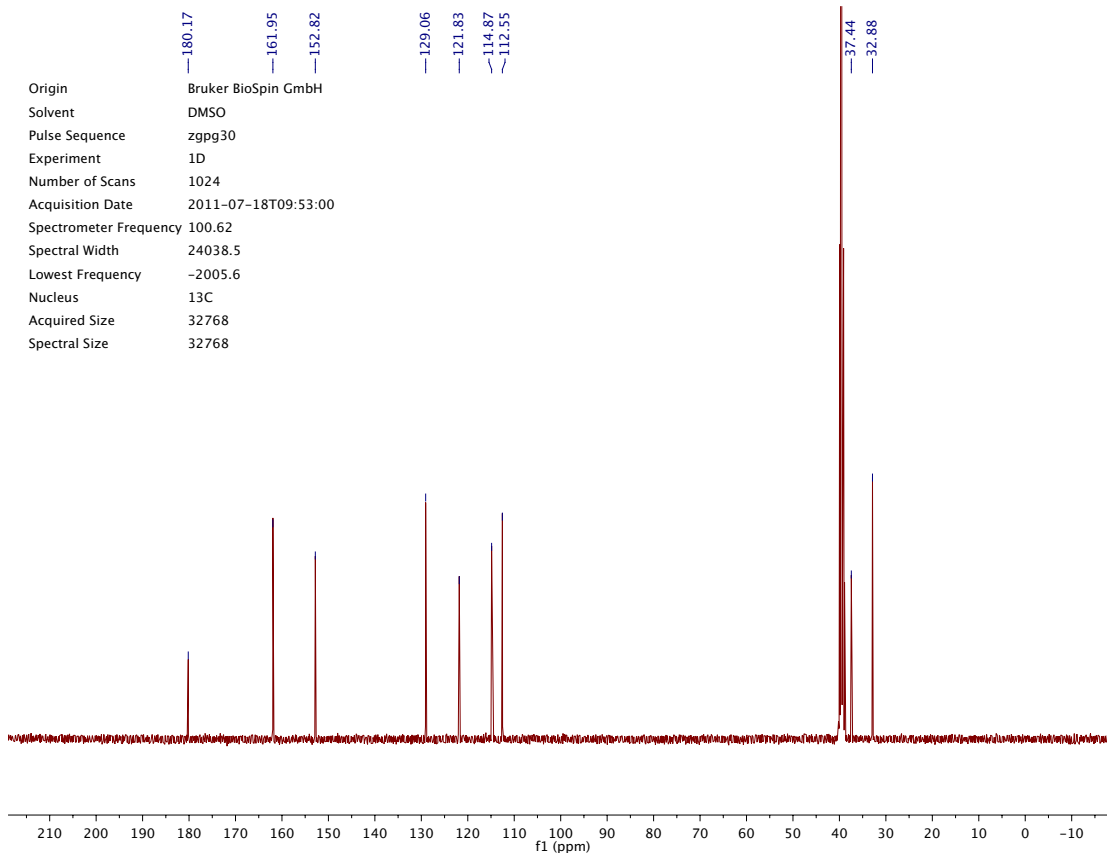

Origin Bruker BioSpin GmbH  
 Solvent CDCl3  
 Pulse Sequence zg30  
 Experiment 1D  
 Number of Scans 16  
 Acquisition Date 2011-06-06T16:45:00  
 Spectrometer Frequency 400.13  
 Spectral Width 8223.7  
 Lowest Frequency -1646.6  
 Nucleus 1H  
 Acquired Size 32768  
 Spectral Size 32768

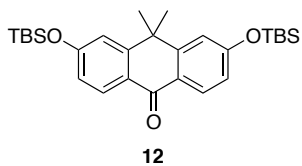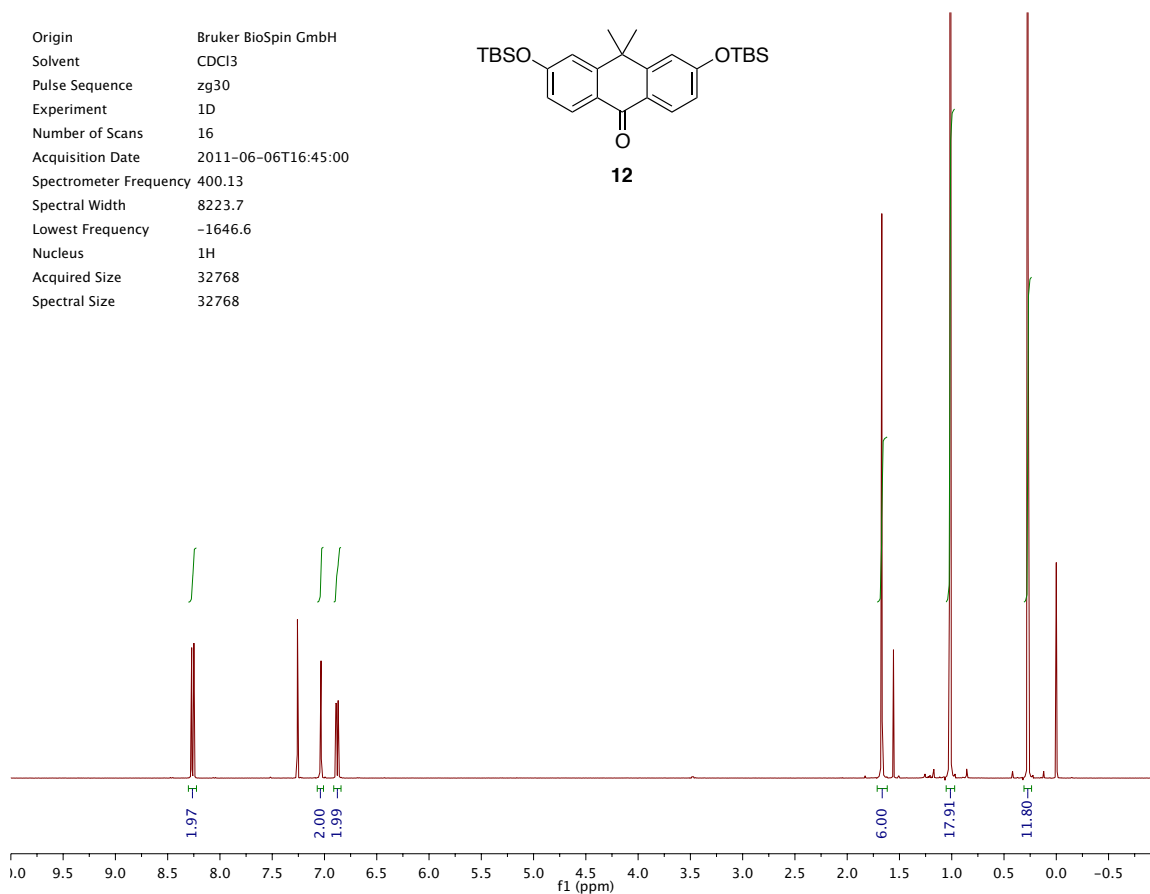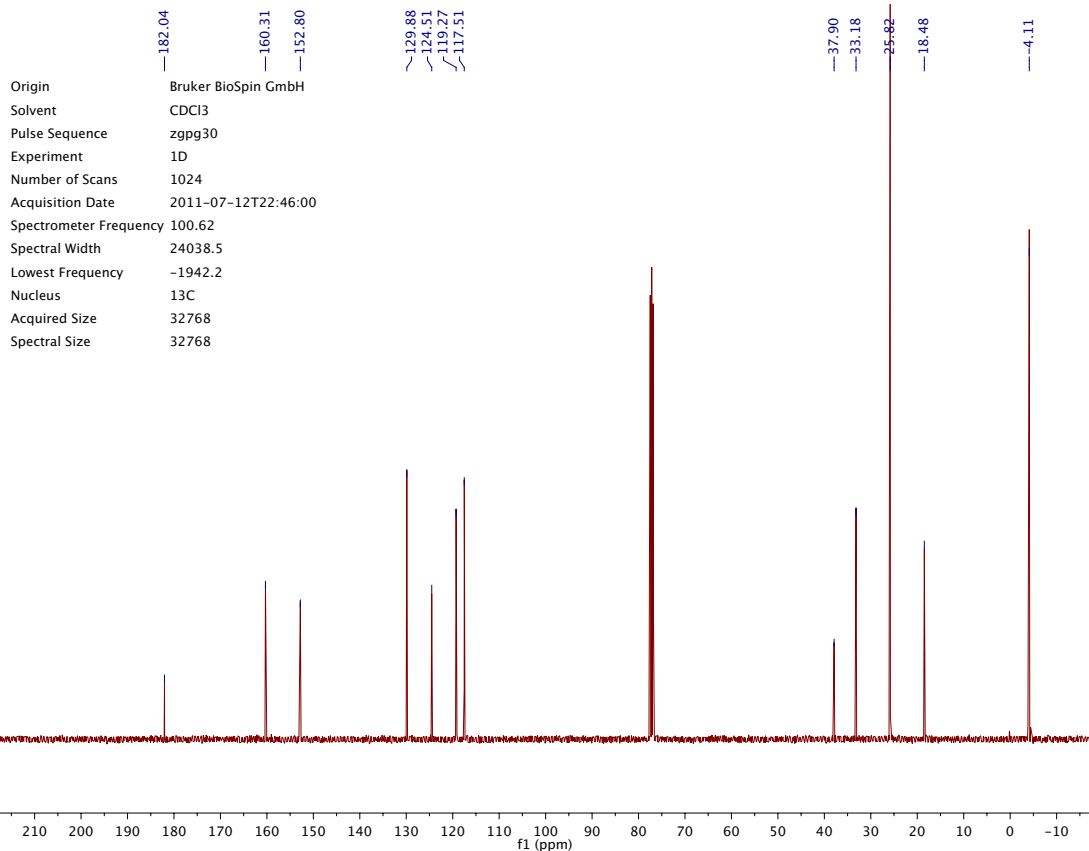

Origin Bruker BioSpin GmbH  
 Solvent CDCl3  
 Pulse Sequence zgpg30  
 Experiment 1D  
 Number of Scans 1024  
 Acquisition Date 2011-07-12T22:46:00  
 Spectrometer Frequency 100.62  
 Spectral Width 24038.5  
 Lowest Frequency -1942.2  
 Nucleus 13C  
 Acquired Size 32768  
 Spectral Size 32768

Origin Bruker BioSpin GmbH  
 Solvent CDCl3  
 Pulse Sequence zg30  
 Experiment 1D  
 Number of Scans 16  
 Acquisition Date 2011-07-08T17:47:00  
 Spectrometer Frequency 400.13  
 Spectral Width 8223.7  
 Lowest Frequency -1642.6  
 Nucleus 1H  
 Acquired Size 32768  
 Spectral Size 32768

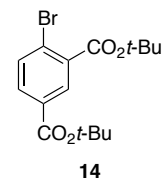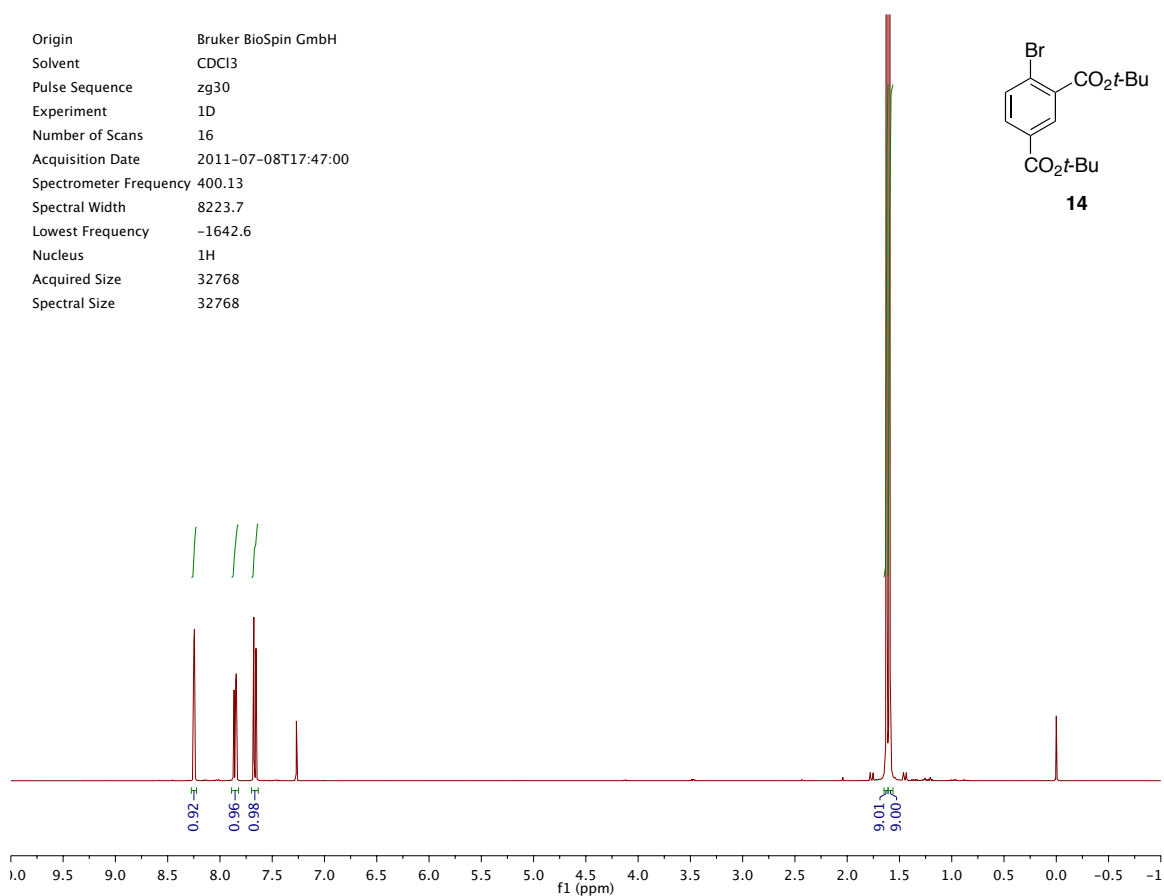

Origin Bruker BioSpin GmbH  
 Solvent CDCl3  
 Pulse Sequence zgpg30  
 Experiment 1D  
 Number of Scans 1024  
 Acquisition Date 2011-07-08T18:48:00  
 Spectrometer Frequency 100.62  
 Spectral Width 24038.5  
 Lowest Frequency -1942.7  
 Nucleus 13C  
 Acquired Size 32768  
 Spectral Size 32768

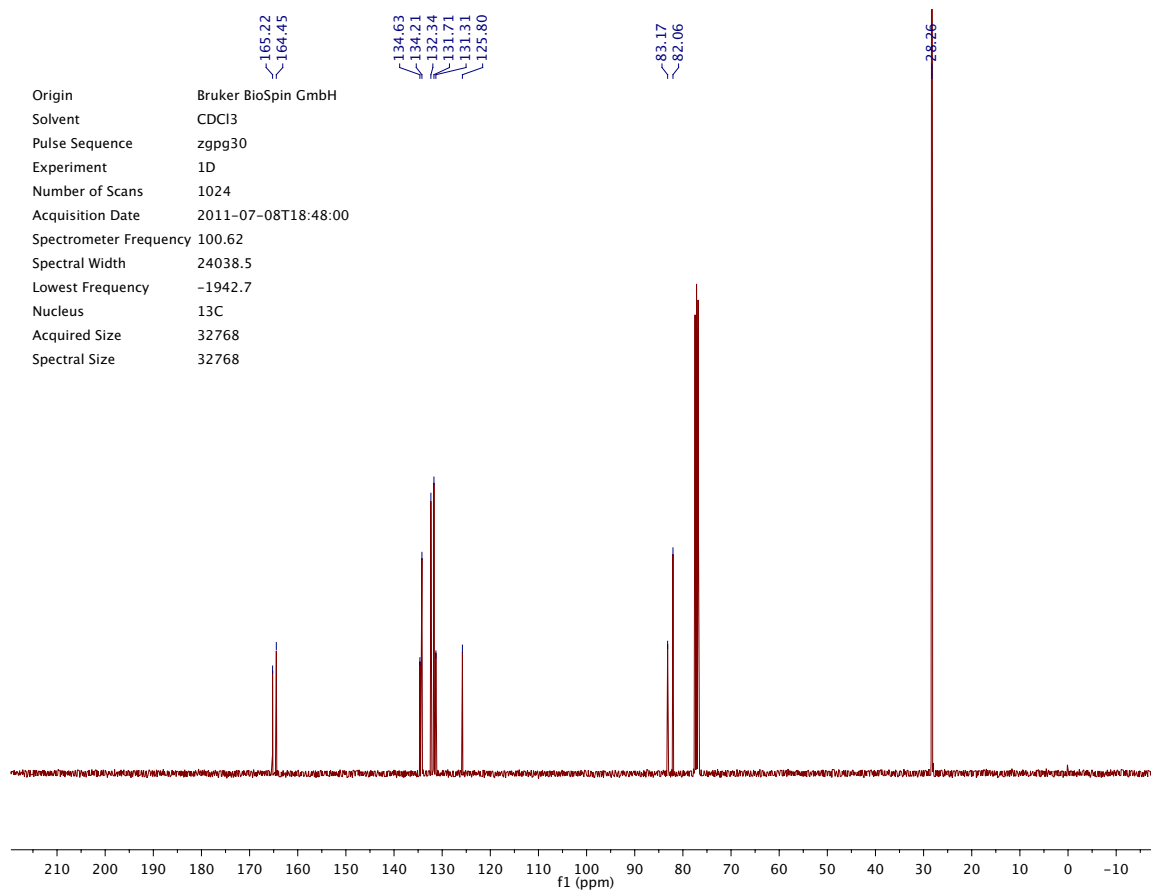

Origin Bruker BioSpin GmbH  
 Solvent CDCl3  
 Pulse Sequence zg30  
 Experiment 1D  
 Number of Scans 16  
 Acquisition Date 2011-06-17T11:03:00  
 Spectrometer Frequency 400.13  
 Spectral Width 8223.7  
 Lowest Frequency -1647.0  
 Nucleus 1H  
 Acquired Size 32768  
 Spectral Size 32768

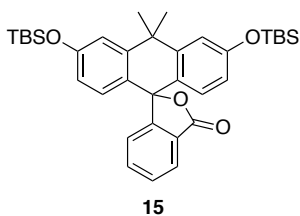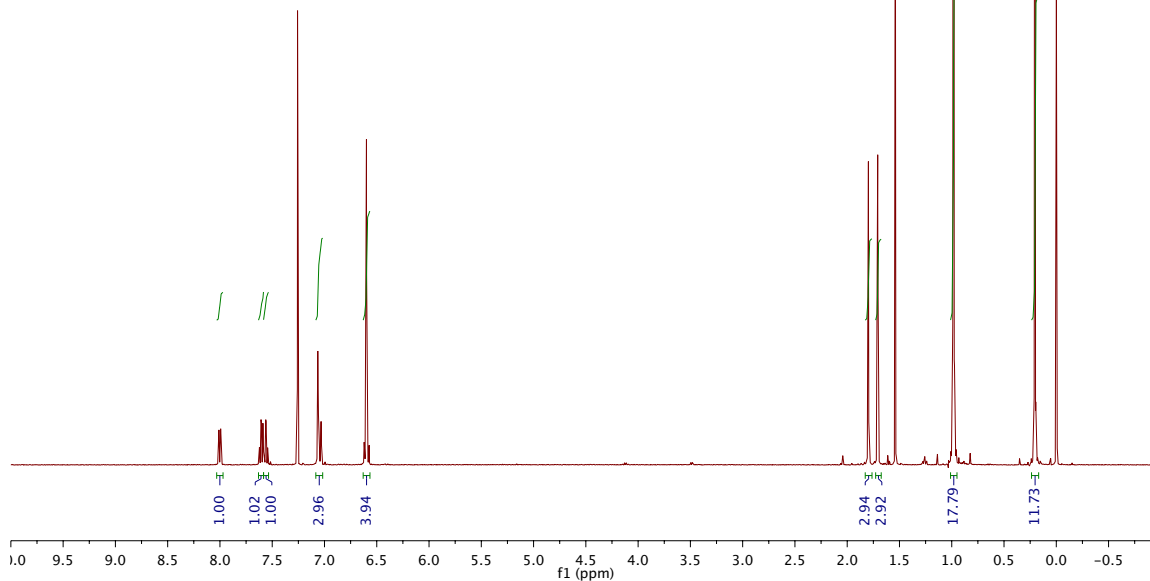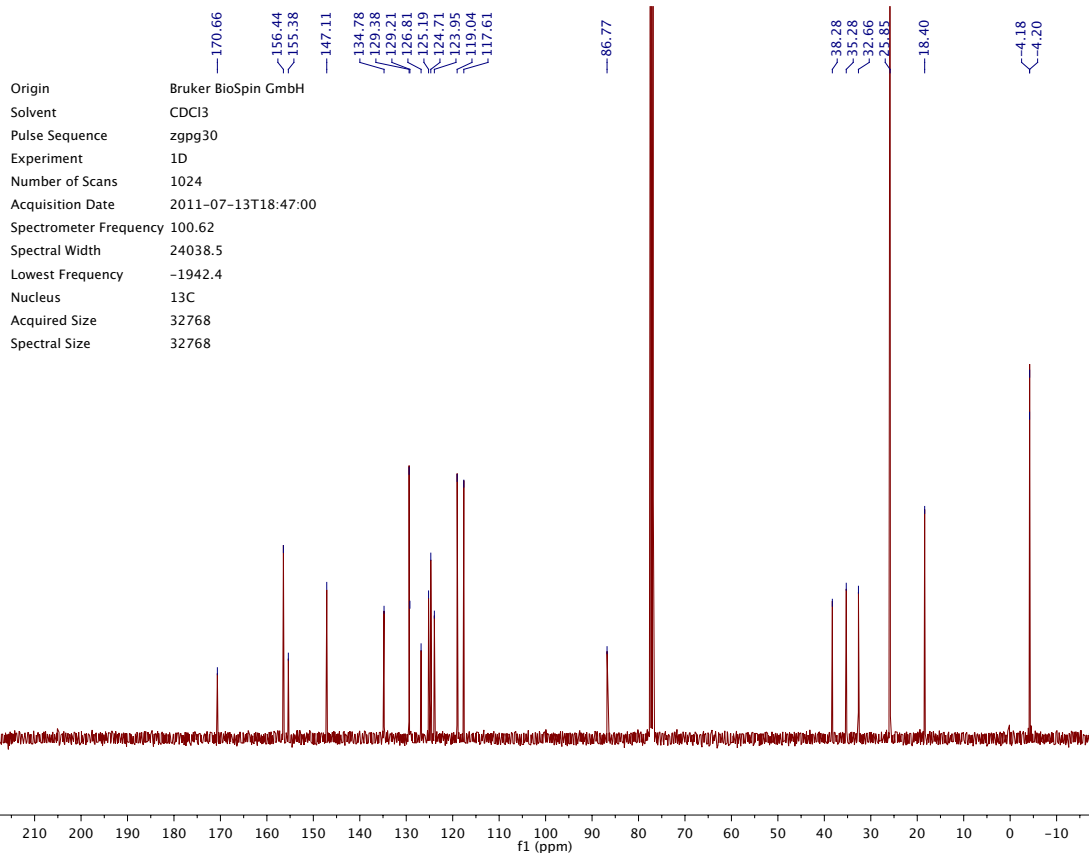

Origin Bruker BioSpin GmbH  
 Solvent CDCl3  
 Pulse Sequence zgpg30  
 Experiment 1D  
 Number of Scans 1024  
 Acquisition Date 2011-07-13T18:47:00  
 Spectrometer Frequency 100.62  
 Spectral Width 24038.5  
 Lowest Frequency -1942.4  
 Nucleus 13C  
 Acquired Size 32768  
 Spectral Size 32768



Origin Bruker BioSpin GmbH  
 Solvent CDCl3  
 Pulse Sequence zg30  
 Experiment 1D  
 Number of Scans 16  
 Acquisition Date 2011-07-07T08:43:00  
 Spectrometer Frequency 400.13  
 Spectral Width 8223.7  
 Lowest Frequency -1646.7  
 Nucleus 1H  
 Acquired Size 32768  
 Spectral Size 32768

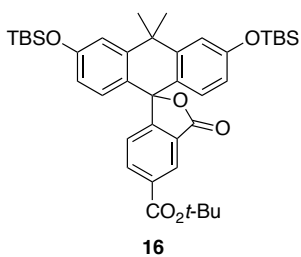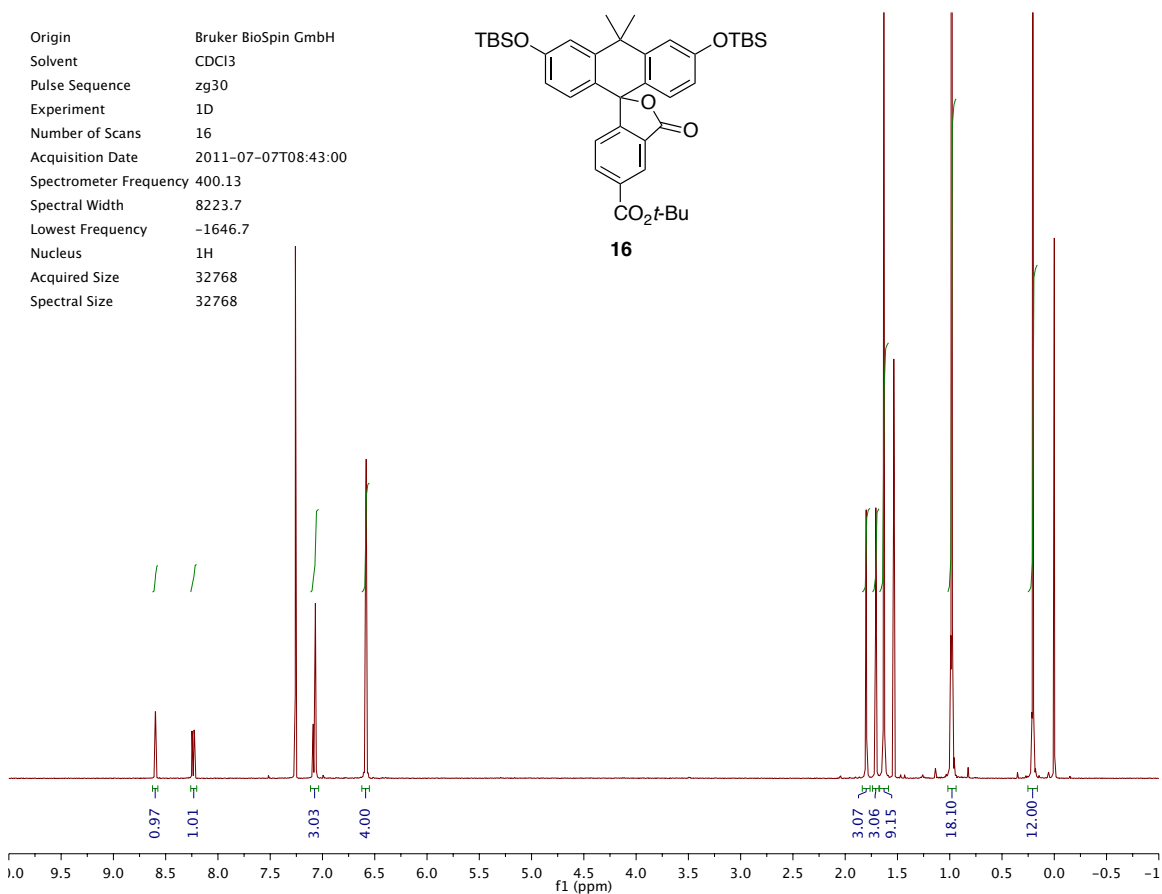

Origin Bruker BioSpin GmbH  
 Solvent CDCl3  
 Pulse Sequence zgpg30  
 Experiment 1D  
 Number of Scans 2048  
 Acquisition Date 2011-07-11T19:28:00  
 Spectrometer Frequency 100.62  
 Spectral Width 24038.5  
 Lowest Frequency -1942.7  
 Nucleus 13C  
 Acquired Size 32768  
 Spectral Size 32768

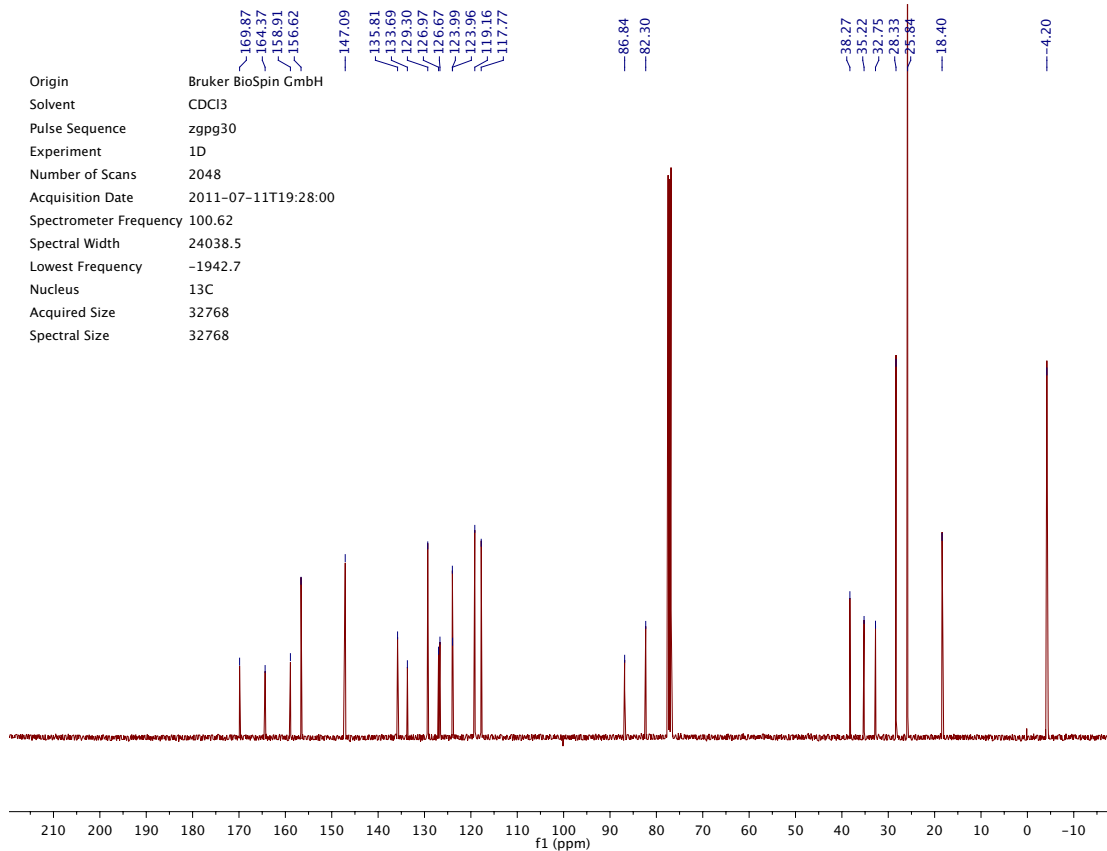

Origin Bruker BioSpin GmbH  
 Solvent MeOD  
 Pulse Sequence zg30  
 Experiment 1D  
 Number of Scans 16  
 Acquisition Date 2011-07-14T08:46:00  
 Spectrometer Frequency 400.13  
 Spectral Width 8223.7  
 Lowest Frequency -1644.3  
 Nucleus 1H  
 Acquired Size 32768  
 Spectral Size 32768

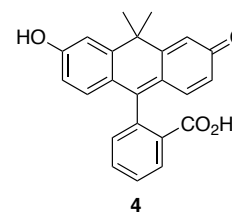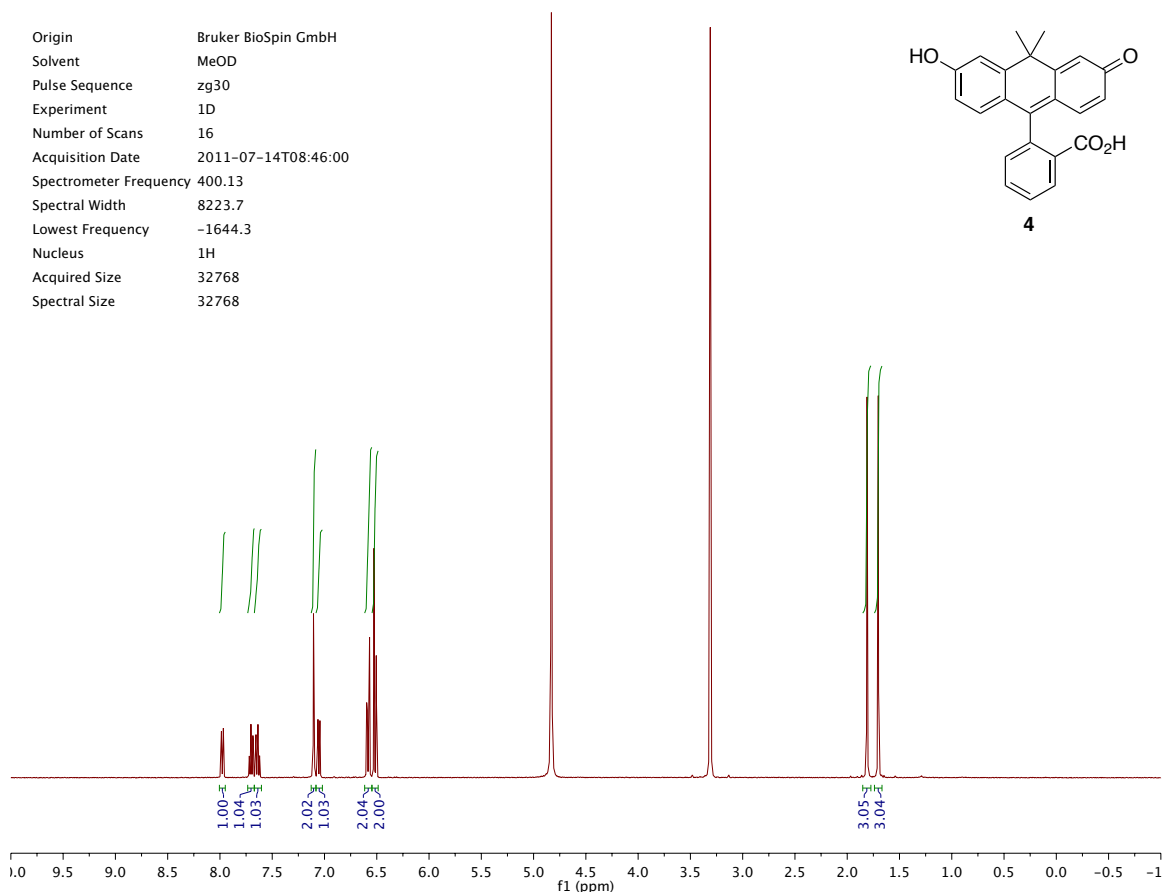

Origin Bruker BioSpin GmbH  
 Solvent MeOD  
 Pulse Sequence zgpg30  
 Experiment 1D  
 Number of Scans 1024  
 Acquisition Date 2011-07-14T10:39:00  
 Spectrometer Frequency 100.62  
 Spectral Width 24038.5  
 Lowest Frequency -1816.4  
 Nucleus 13C  
 Acquired Size 32768  
 Spectral Size 32768

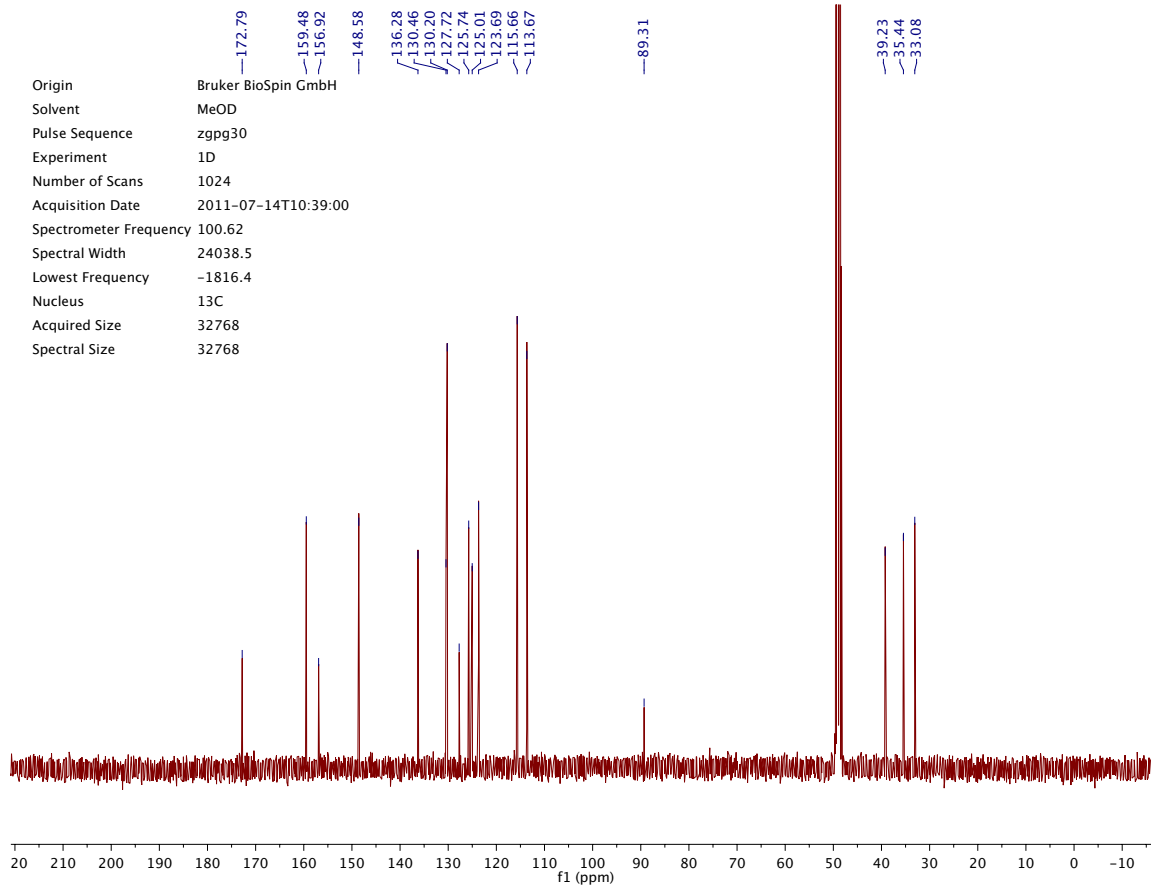

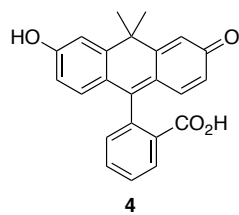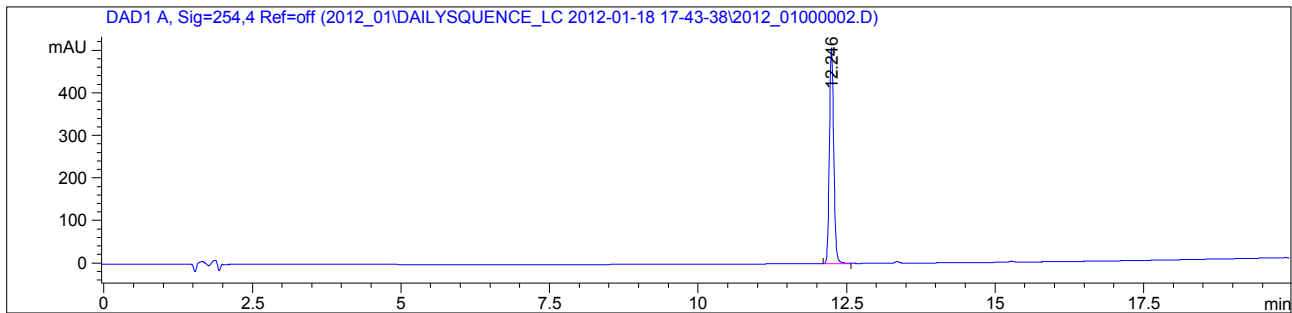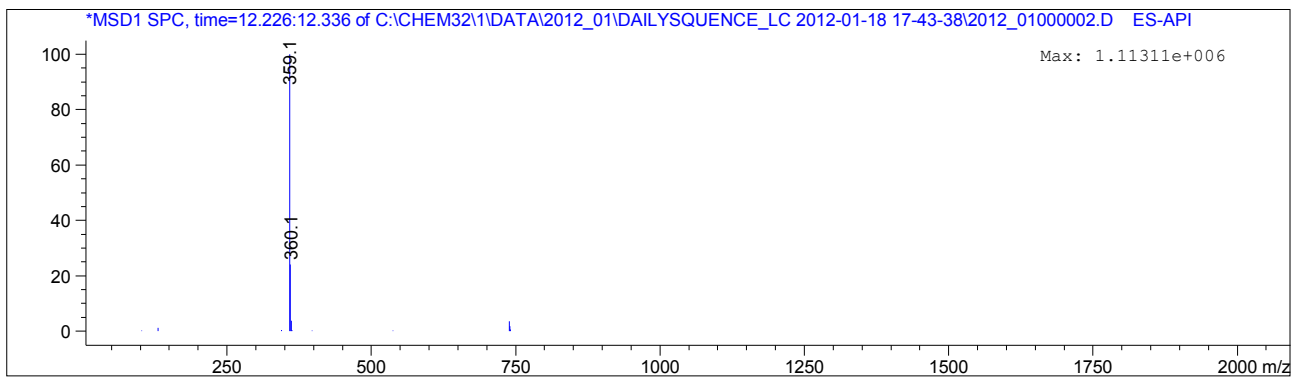

Origin Bruker BioSpin GmbH  
 Solvent DMSO  
 Pulse Sequence zg30  
 Experiment 1D  
 Number of Scans 16  
 Acquisition Date 2011-12-27T09:42:00  
 Spectrometer Frequency 400.13  
 Spectral Width 8223.7  
 Lowest Frequency -1638.5  
 Nucleus 1H  
 Acquired Size 32768  
 Spectral Size 32768

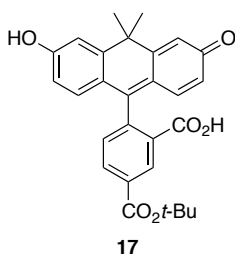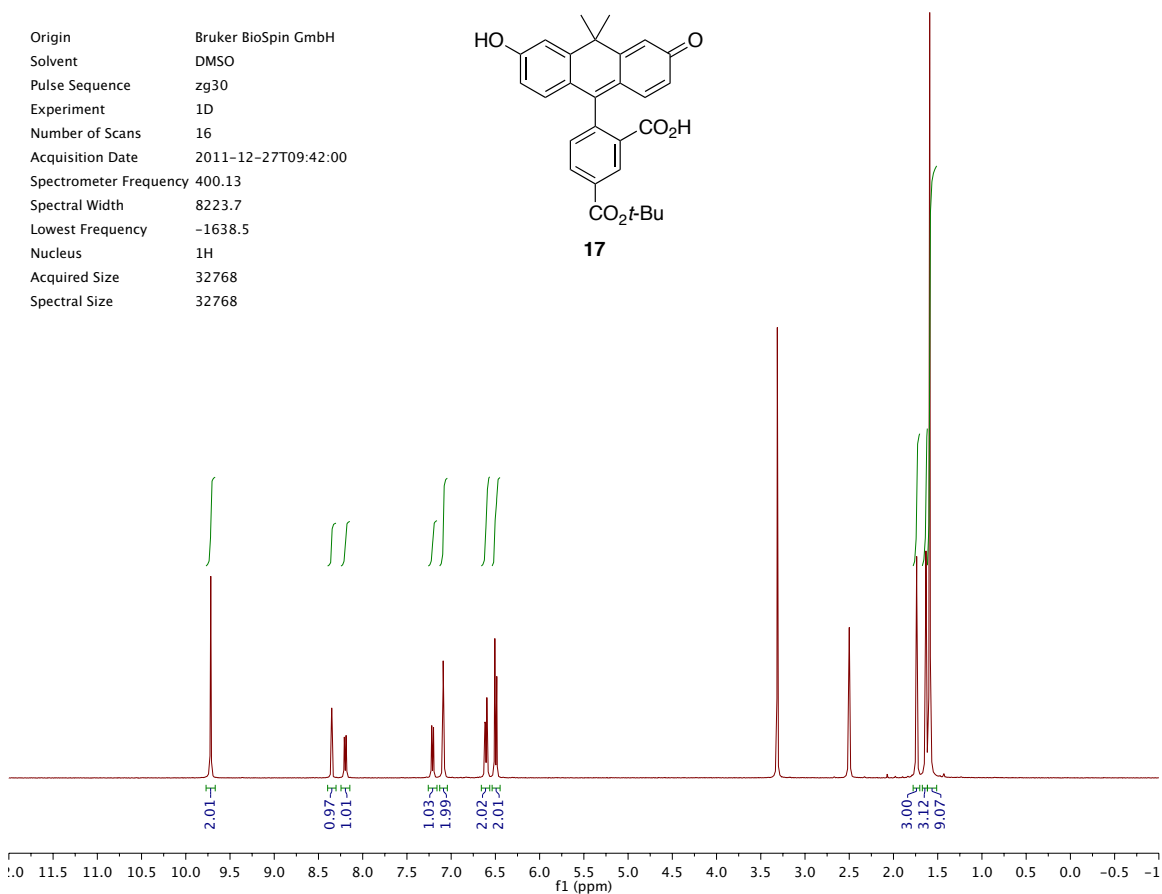

Origin Bruker BioSpin GmbH  
 Solvent DMSO  
 Pulse Sequence zgpg30  
 Experiment 1D  
 Number of Scans 1024  
 Acquisition Date 2011-12-20T11:13:00  
 Spectrometer Frequency 100.62  
 Spectral Width 24038.5  
 Lowest Frequency -2006.1  
 Nucleus 13C  
 Acquired Size 32768  
 Spectral Size 32768

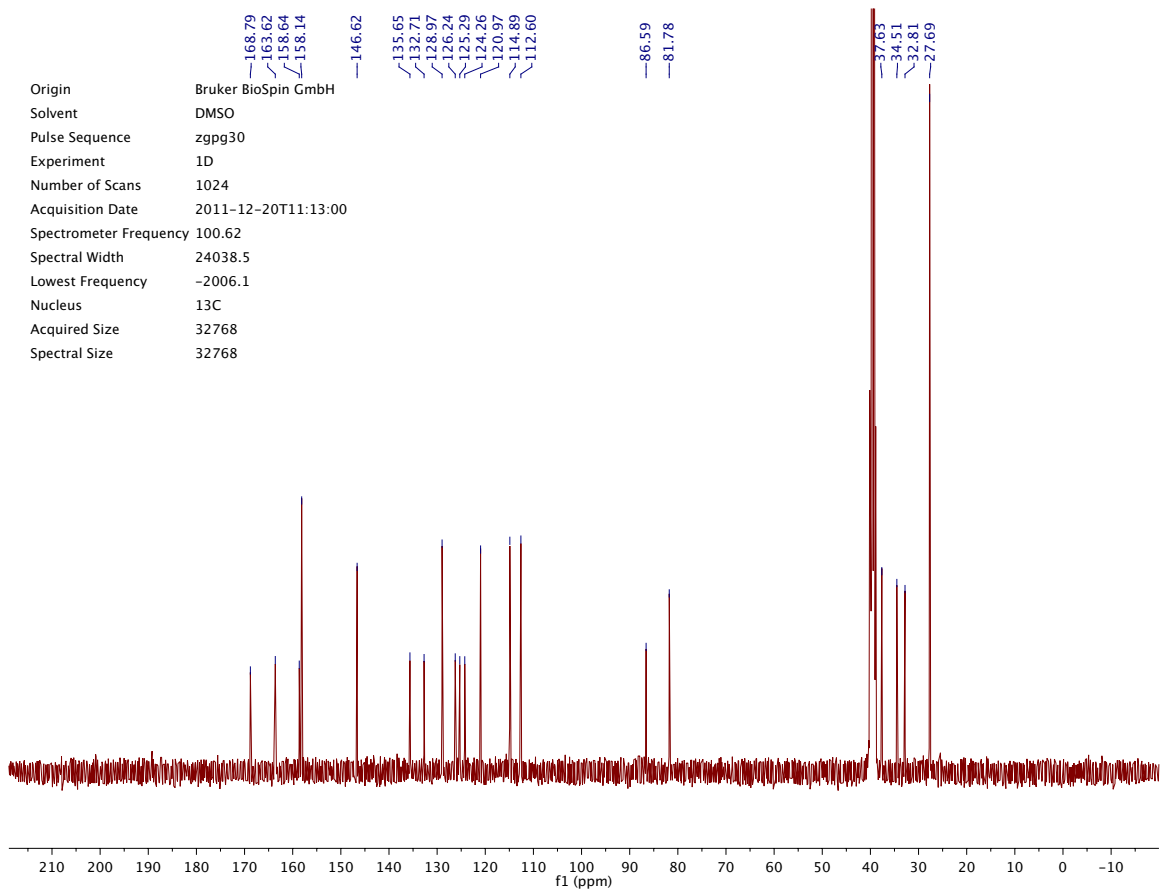

Origin Bruker BioSpin GmbH  
 Solvent DMSO  
 Pulse Sequence zg30  
 Experiment 1D  
 Number of Scans 16  
 Acquisition Date 2011-12-29T16:25:00  
 Spectrometer Frequency 400.13  
 Spectral Width 8223.7  
 Lowest Frequency -1638.5  
 Nucleus 1H  
 Acquired Size 32768  
 Spectral Size 32768

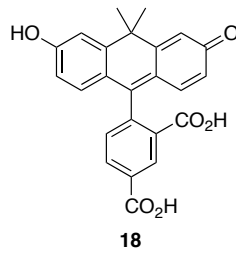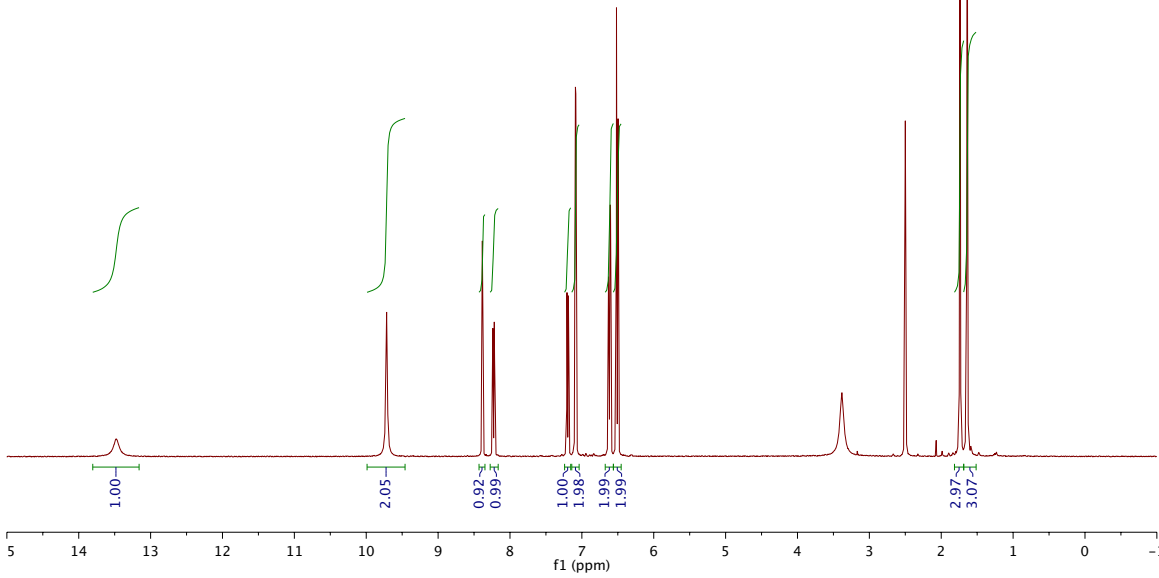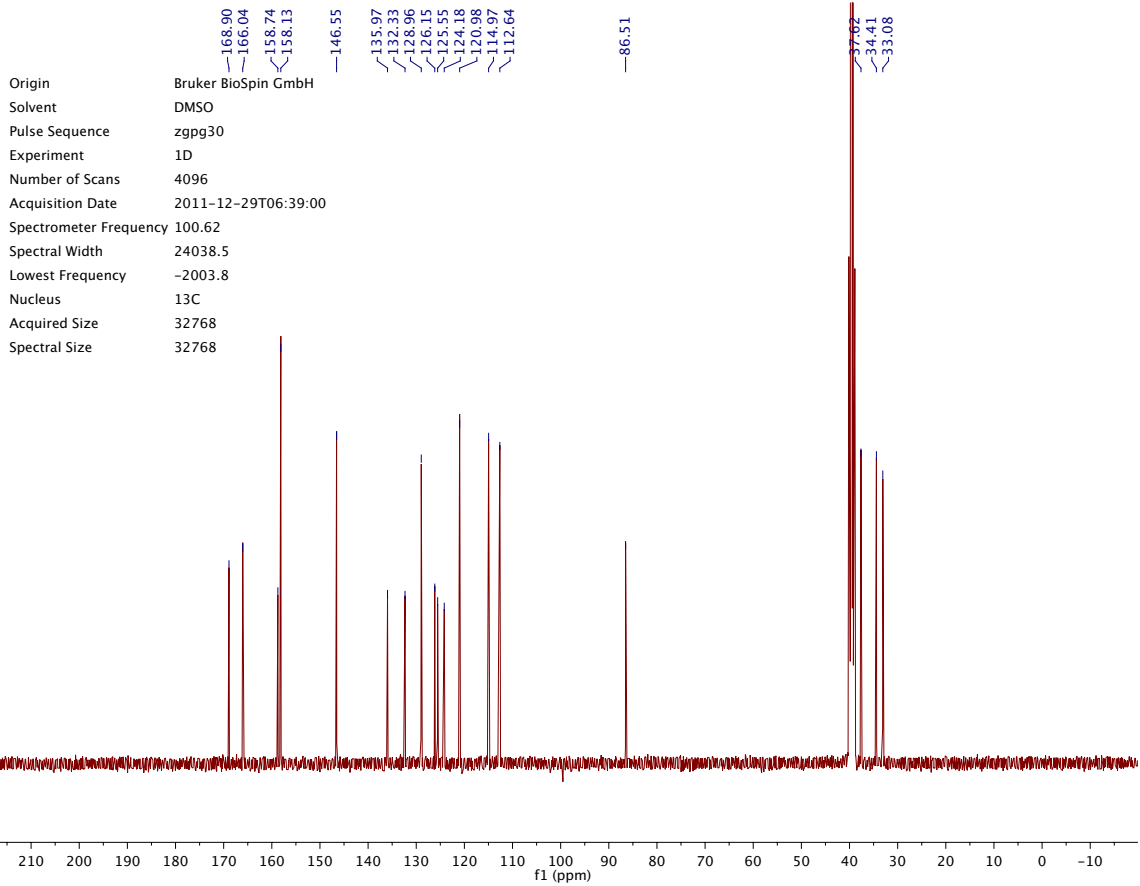

Origin Bruker BioSpin GmbH  
 Solvent DMSO  
 Pulse Sequence zgpg30  
 Experiment 1D  
 Number of Scans 4096  
 Acquisition Date 2011-12-29T06:39:00  
 Spectrometer Frequency 100.62  
 Spectral Width 24038.5  
 Lowest Frequency -2003.8  
 Nucleus 13C  
 Acquired Size 32768  
 Spectral Size 32768

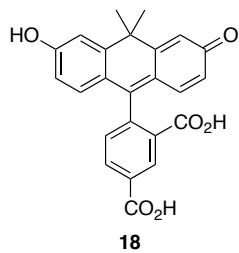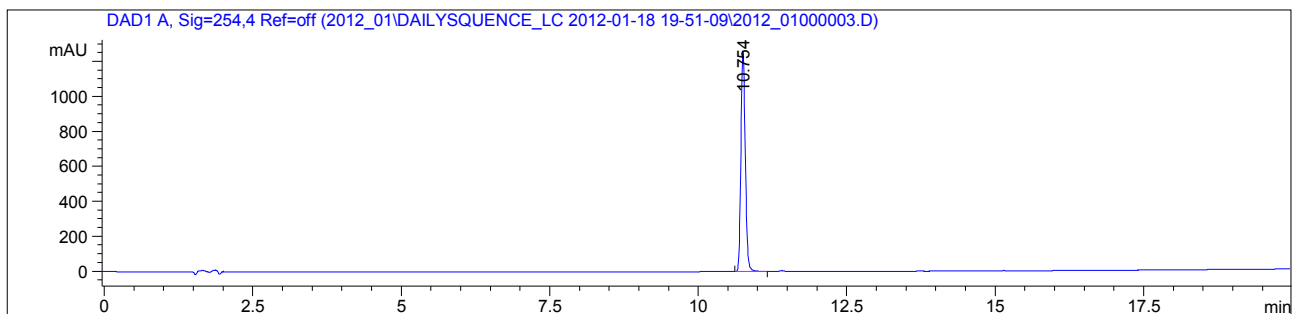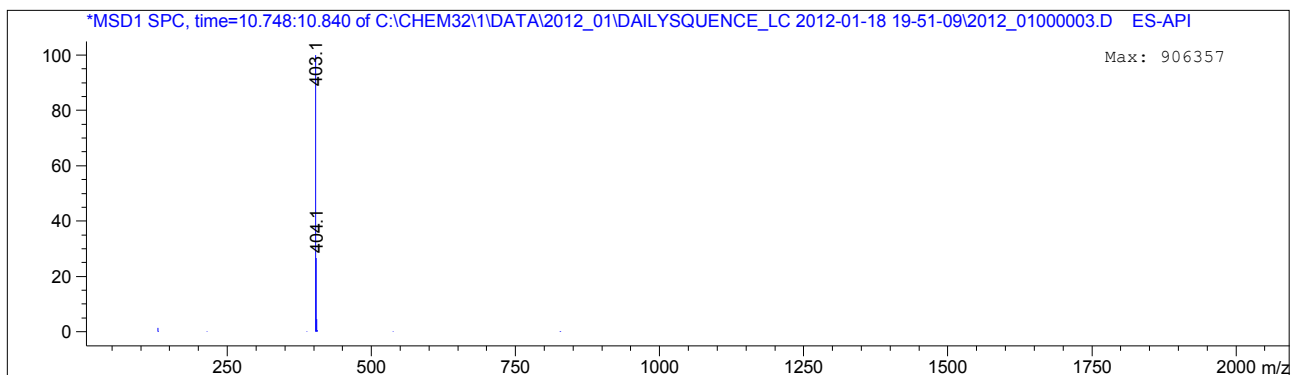

Origin Bruker BioSpin GmbH  
 Solvent DMSO  
 Pulse Sequence zg30  
 Experiment 1D  
 Number of Scans 16  
 Acquisition Date 2011-12-28T17:40:00  
 Spectrometer Frequency 400.13  
 Spectral Width 8223.7  
 Lowest Frequency -1638.5  
 Nucleus 1H  
 Acquired Size 32768  
 Spectral Size 32768

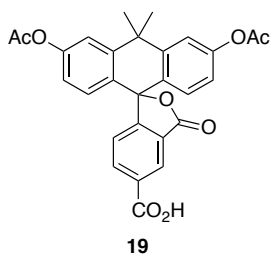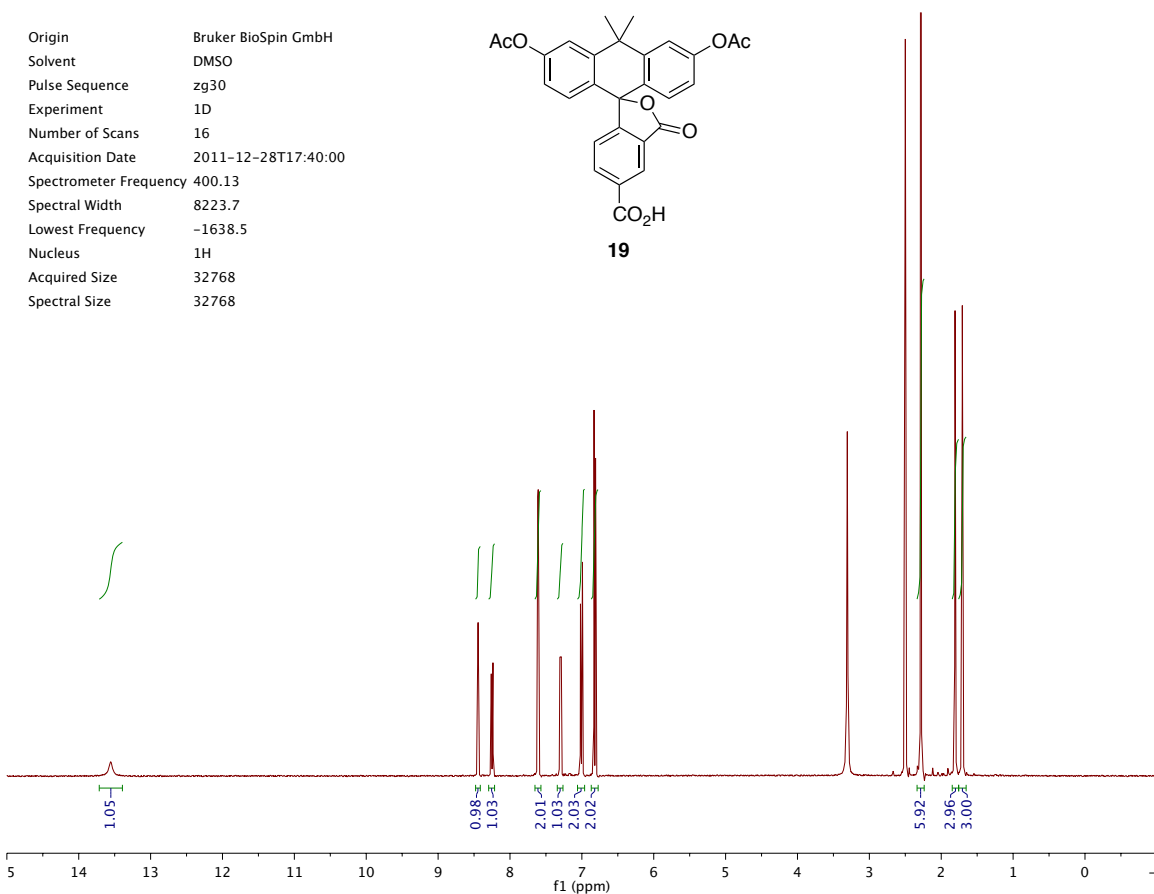

Origin Bruker BioSpin GmbH  
 Solvent DMSO  
 Pulse Sequence zgpg30  
 Experiment 1D  
 Number of Scans 2048  
 Acquisition Date 2011-12-29T11:27:00  
 Spectrometer Frequency 100.62  
 Spectral Width 24038.5  
 Lowest Frequency -2005.6  
 Nucleus 13C  
 Acquired Size 32768  
 Spectral Size 32768

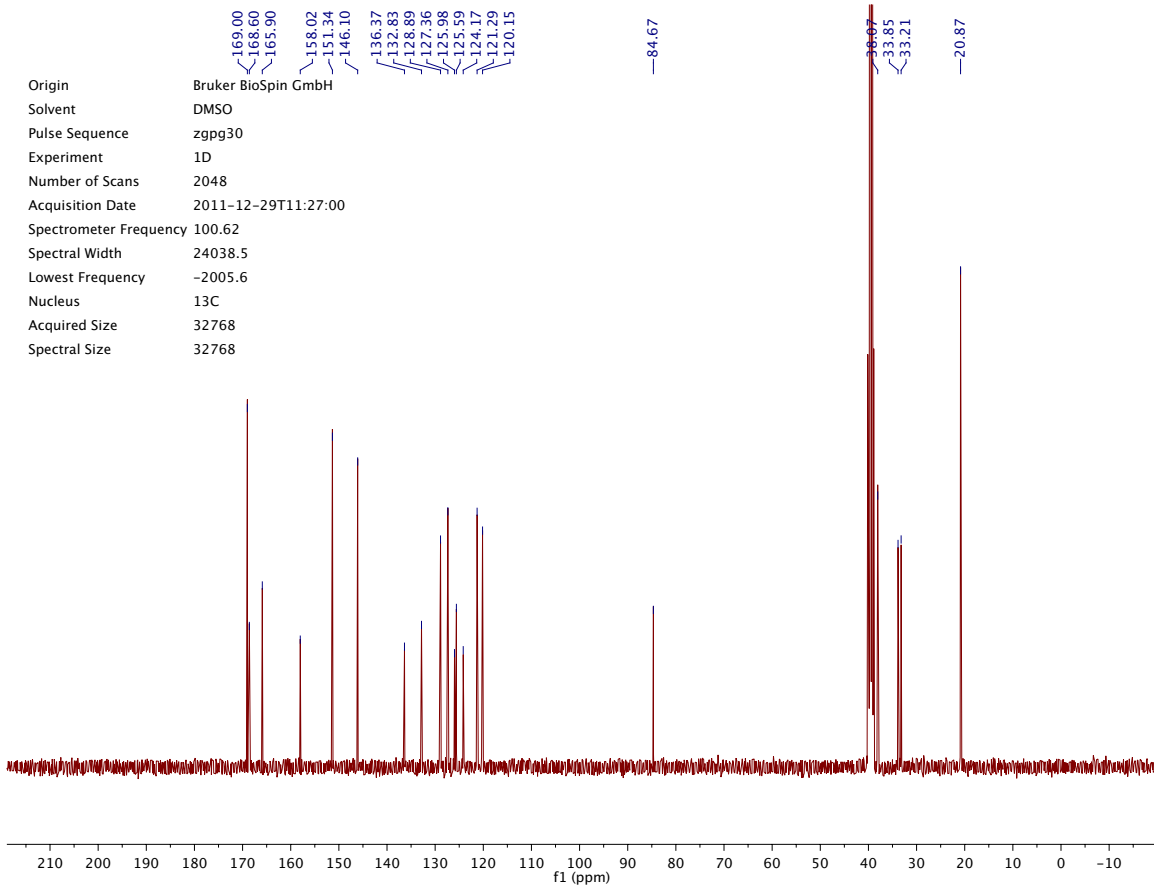

Origin Bruker BioSpin GmbH  
 Solvent CDCl3  
 Pulse Sequence zg30  
 Experiment 1D  
 Number of Scans 16  
 Acquisition Date 2011-12-29T16:31:00  
 Spectrometer Frequency 400.13  
 Spectral Width 8223.7  
 Lowest Frequency -1646.3  
 Nucleus 1H  
 Acquired Size 32768  
 Spectral Size 32768

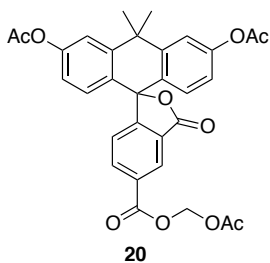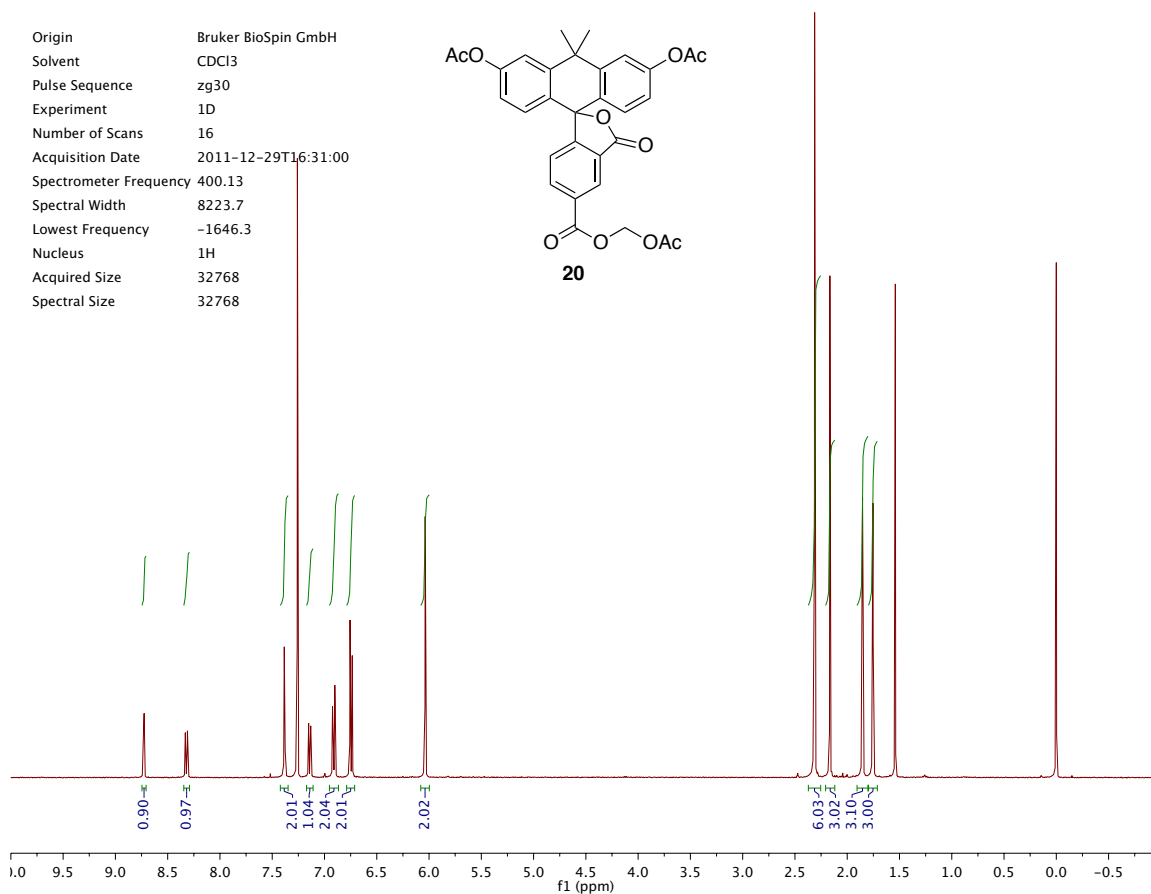

Origin Bruker BioSpin GmbH  
 Solvent CDCl3  
 Pulse Sequence zgpg30  
 Experiment 1D  
 Number of Scans 1024  
 Acquisition Date 2011-12-30T13:04:00  
 Spectrometer Frequency 100.62  
 Spectral Width 24038.5  
 Lowest Frequency -1944.0  
 Nucleus 13C  
 Acquired Size 32768  
 Spectral Size 32768

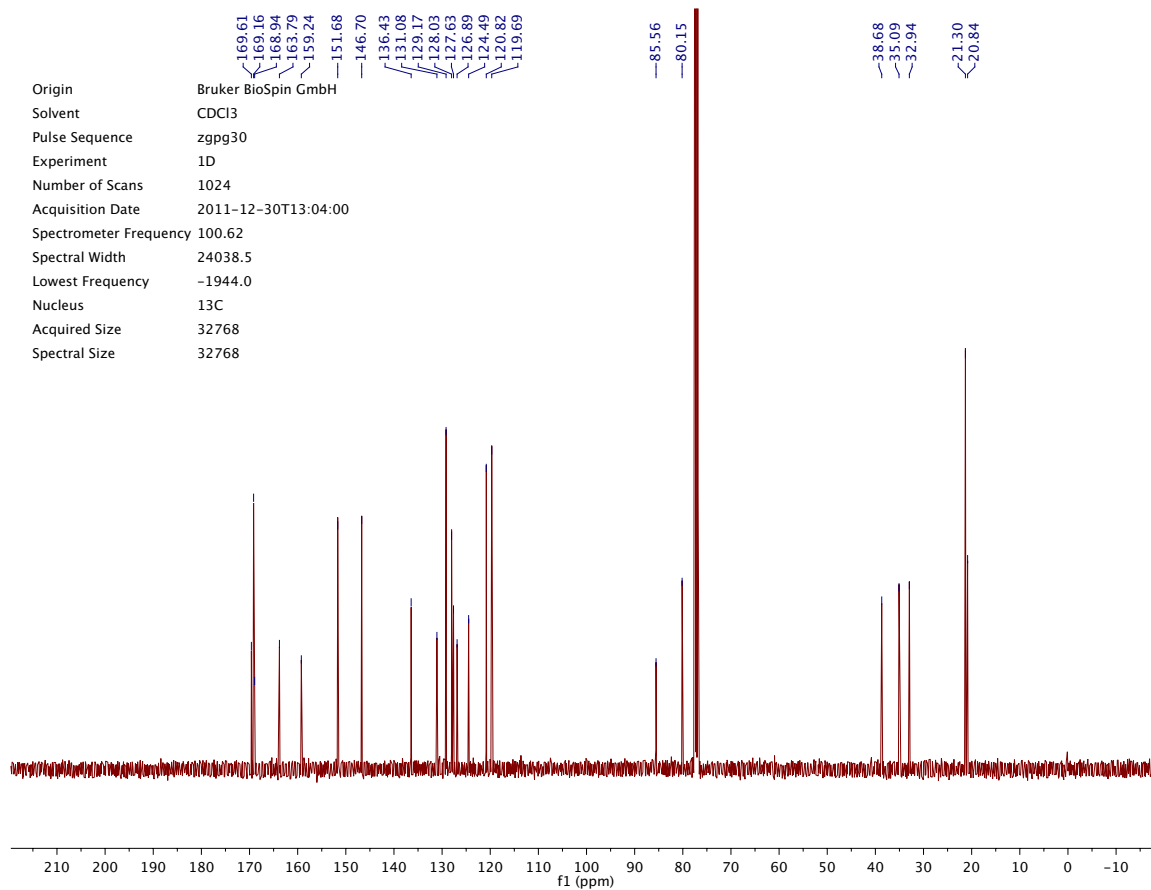



Origin Bruker BioSpin GmbH  
 Solvent CDCl3  
 Pulse Sequence zg30  
 Experiment 1D  
 Number of Scans 16  
 Acquisition Date 2011-07-15T17:49:00  
 Spectrometer Frequency 400.13  
 Spectral Width 8223.7  
 Lowest Frequency -1646.0  
 Nucleus 1H  
 Acquired Size 32768  
 Spectral Size 32768

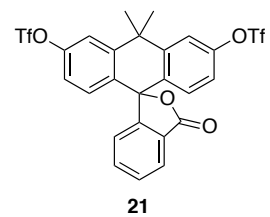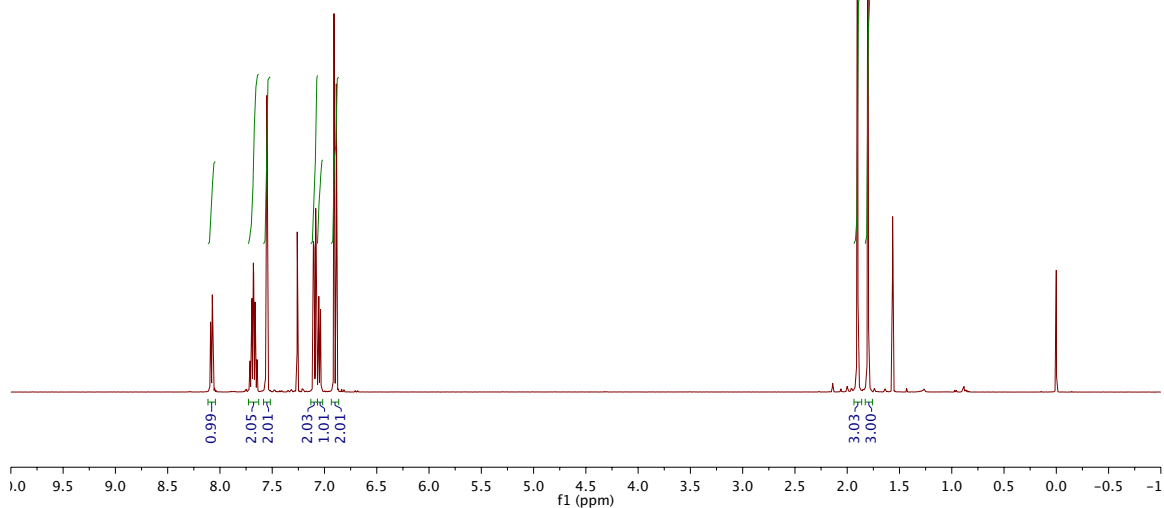

Origin Bruker BioSpin GmbH  
 Solvent CDCl3  
 Pulse Sequence zgpg30  
 Experiment 1D  
 Number of Scans 4096  
 Acquisition Date 2011-07-15T21:44:00  
 Spectrometer Frequency 100.62  
 Spectral Width 24038.5  
 Lowest Frequency -1941.9  
 Nucleus 13C  
 Acquired Size 32768  
 Spectral Size 32768

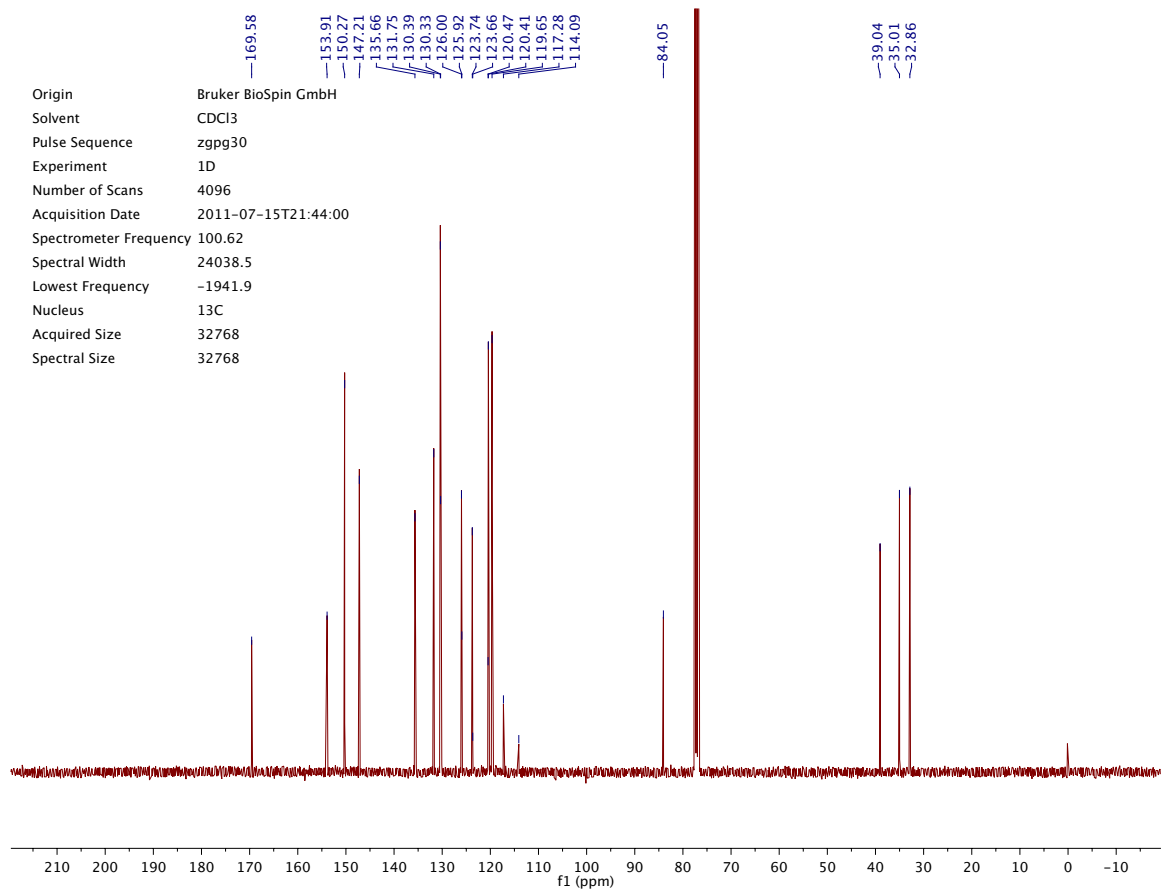

Origin Bruker BioSpin GmbH  
 Solvent CDCl3  
 Pulse Sequence zg30  
 Experiment 1D  
 Number of Scans 16  
 Acquisition Date 2011-06-29T17:08:00  
 Spectrometer Frequency 400.13  
 Spectral Width 8223.7  
 Lowest Frequency -1646.4  
 Nucleus 1H  
 Acquired Size 32768  
 Spectral Size 32768

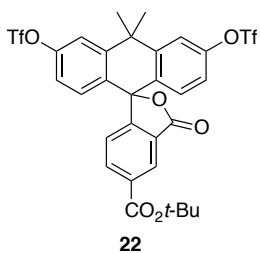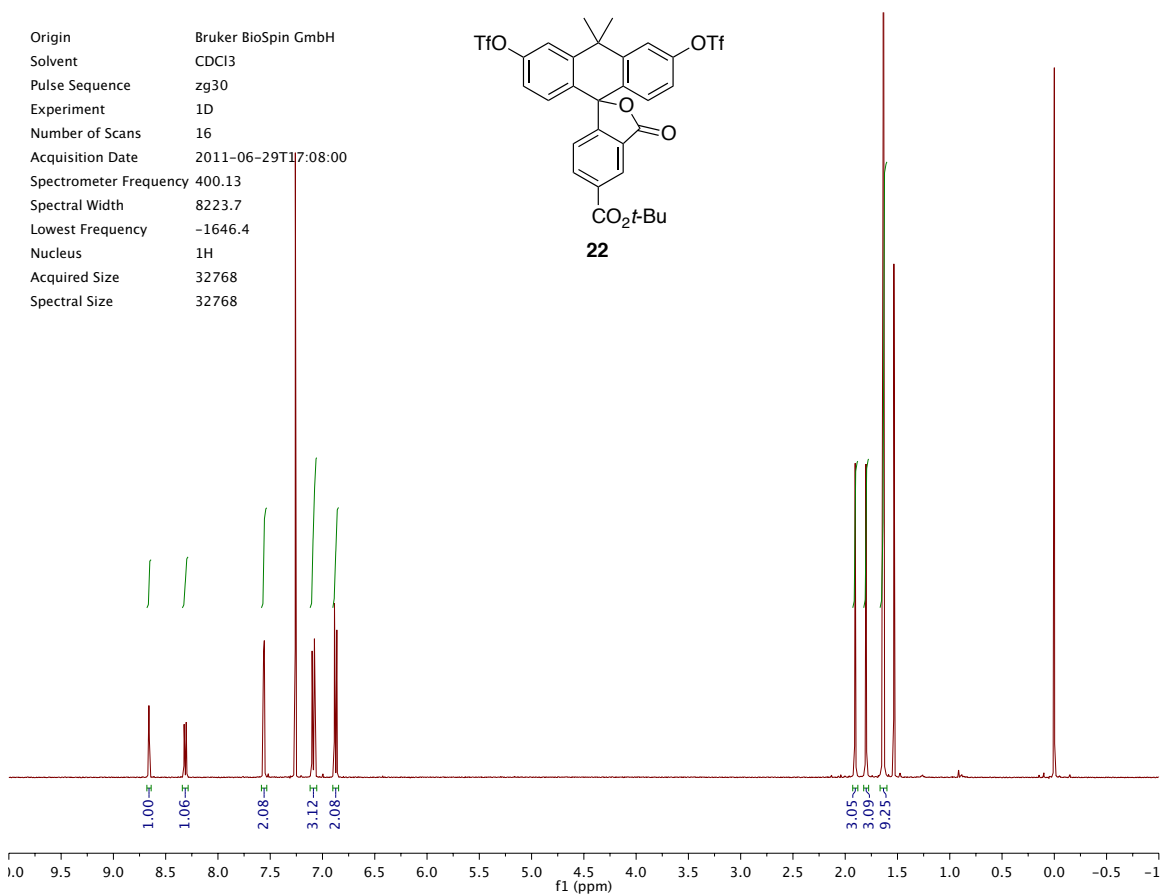

Origin Bruker BioSpin GmbH  
 Solvent CDCl3  
 Pulse Sequence zgpg30  
 Experiment 1D  
 Number of Scans 1024  
 Acquisition Date 2011-07-12T13:11:00  
 Spectrometer Frequency 100.62  
 Spectral Width 24038.5  
 Lowest Frequency -1942.0  
 Nucleus 13C  
 Acquired Size 32768  
 Spectral Size 32768

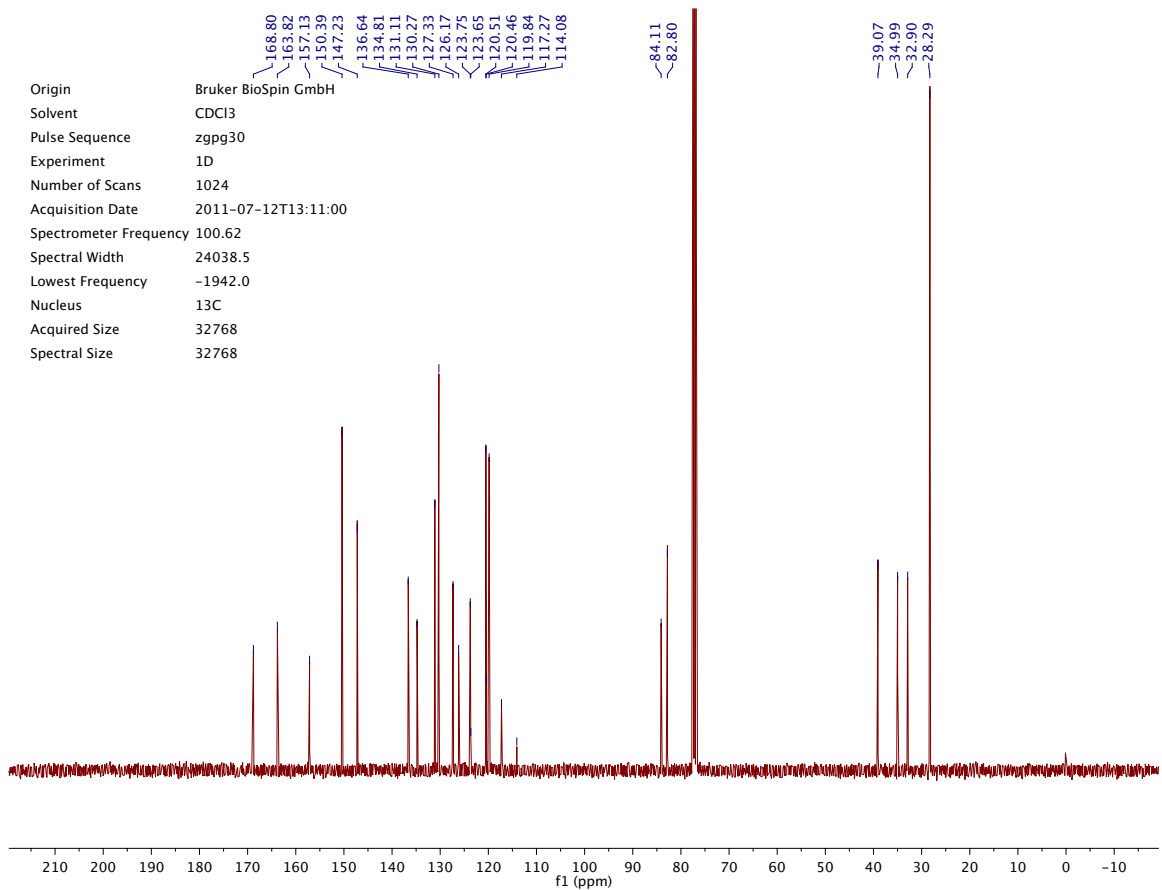

Origin Bruker BioSpin GmbH  
 Solvent CDCl3  
 Pulse Sequence zg30  
 Experiment 1D  
 Number of Scans 16  
 Acquisition Date 2011-07-08T17:42:00  
 Spectrometer Frequency 400.13  
 Spectral Width 8223.7  
 Lowest Frequency -1646.5  
 Nucleus 1H  
 Acquired Size 32768  
 Spectral Size 32768

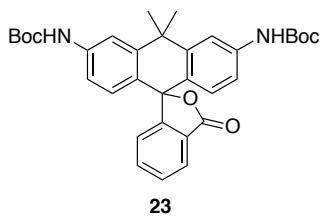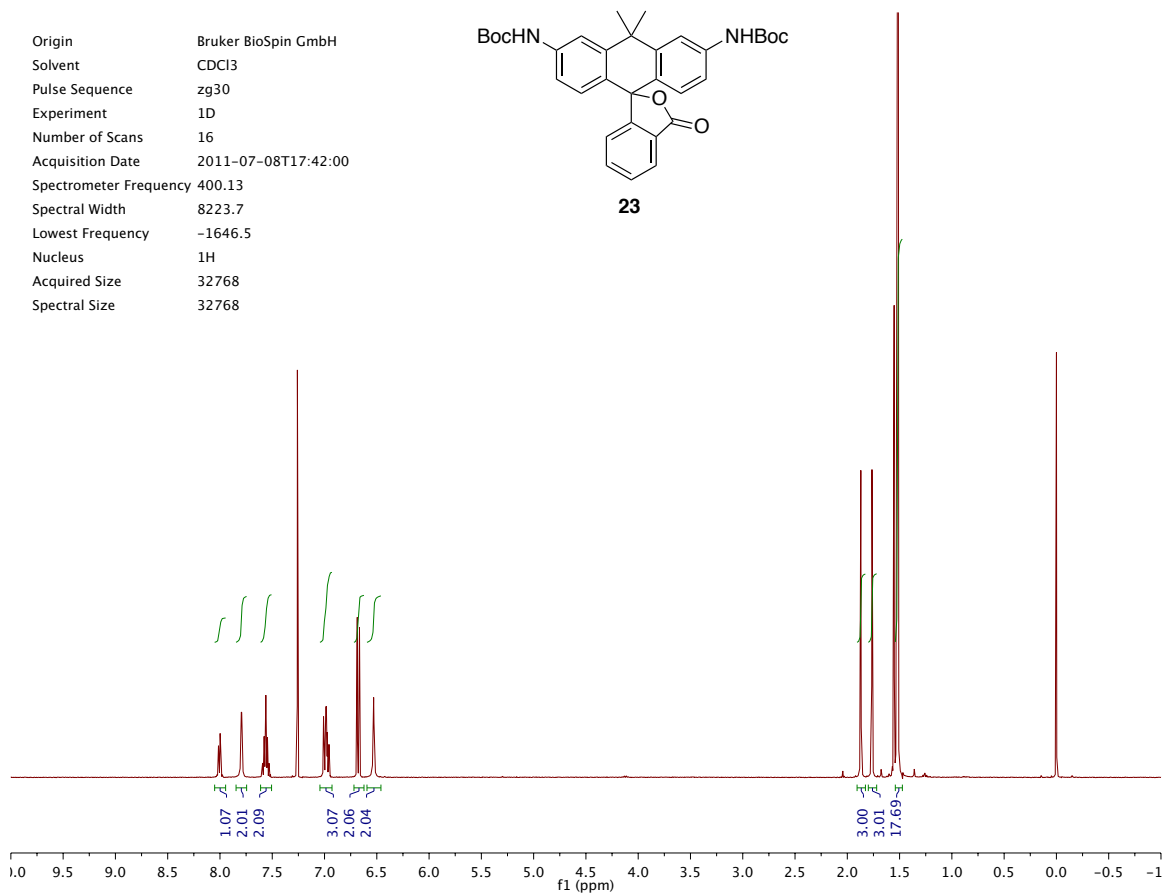

Origin Bruker BioSpin GmbH  
 Solvent CDCl3  
 Pulse Sequence zgpg30  
 Experiment 1D  
 Number of Scans 2048  
 Acquisition Date 2011-07-18T19:39:00  
 Spectrometer Frequency 100.62  
 Spectral Width 24038.5  
 Lowest Frequency -1943.7  
 Nucleus 13C  
 Acquired Size 32768  
 Spectral Size 32768

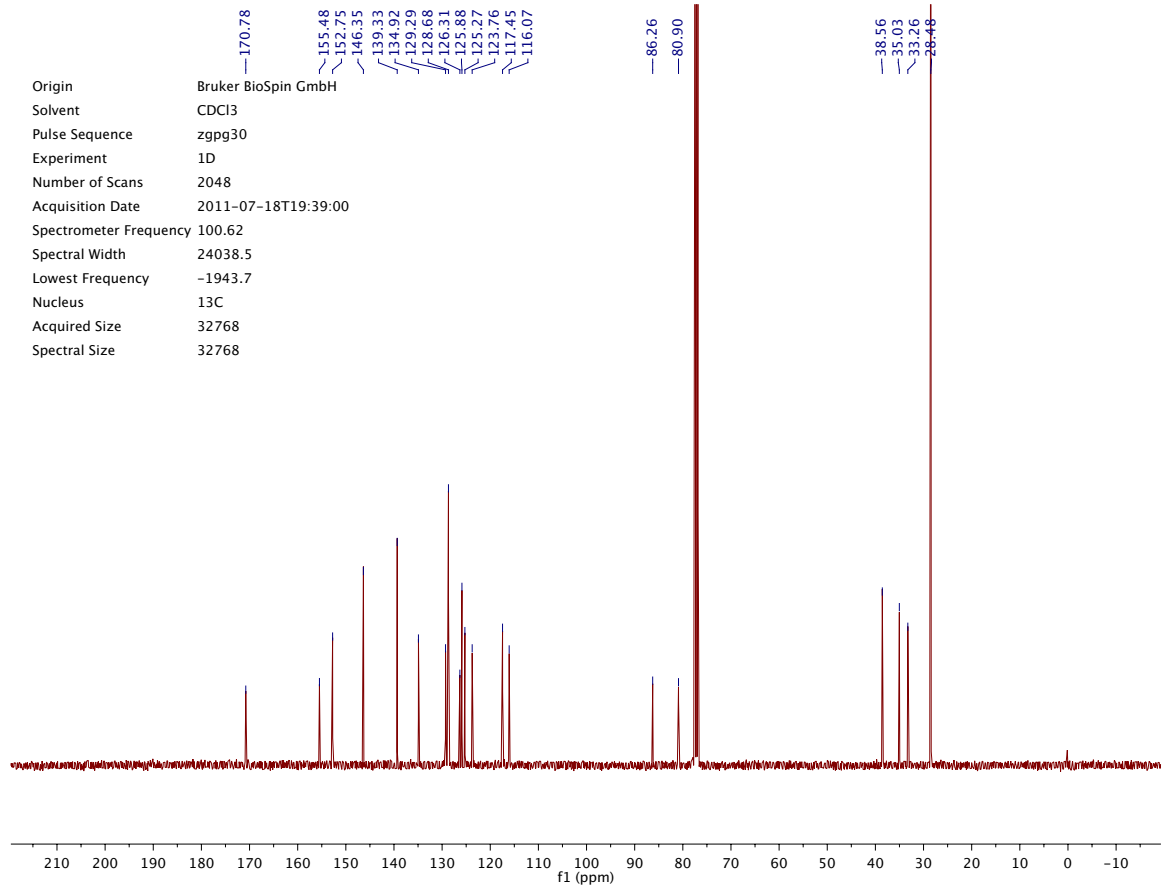

Origin Bruker BioSpin GmbH  
 Solvent CDCl<sub>3</sub>  
 Pulse Sequence zg30  
 Experiment 1D  
 Number of Scans 16  
 Acquisition Date 2011-08-12T17:02:00  
 Spectrometer Frequency 400.13  
 Spectral Width 8223.7  
 Lowest Frequency -1646.4  
 Nucleus <sup>1</sup>H  
 Acquired Size 32768  
 Spectral Size 32768

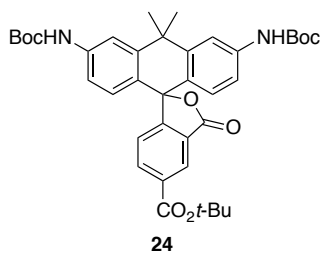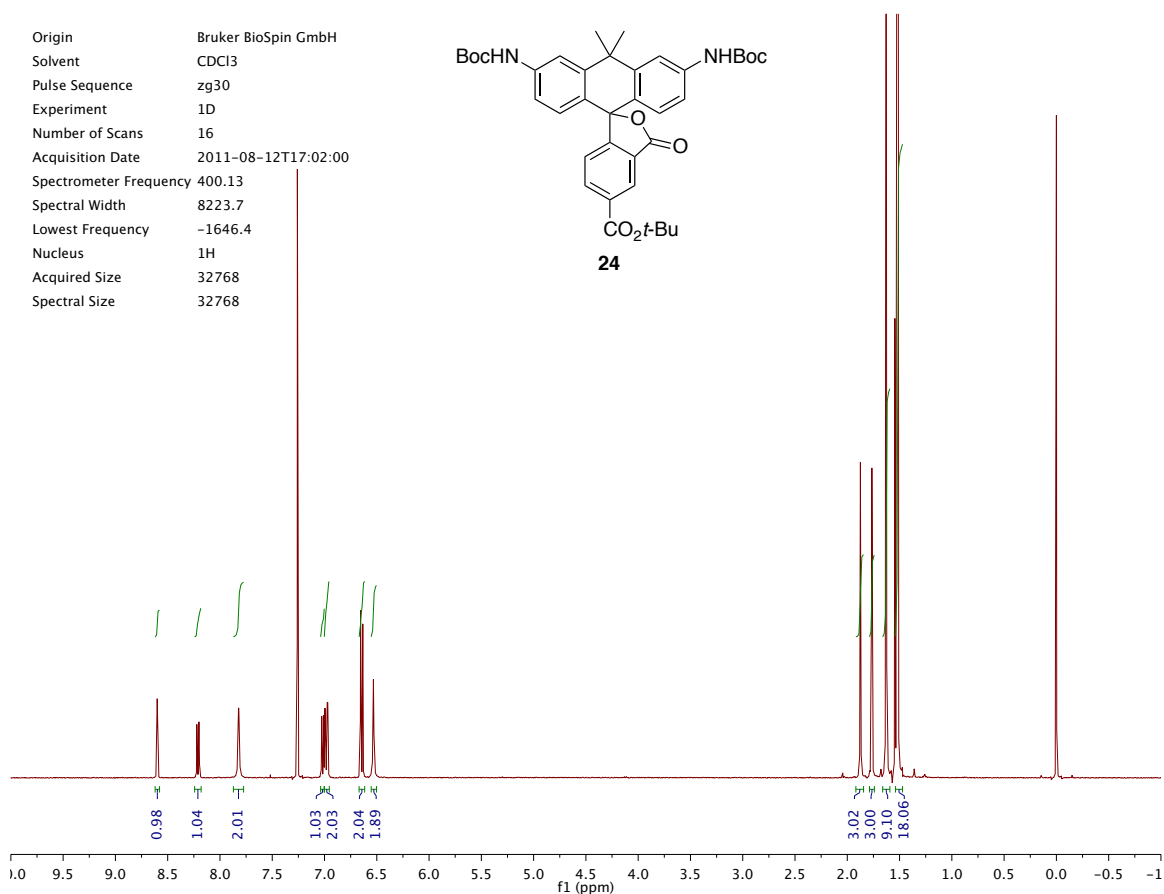

Origin Bruker BioSpin GmbH  
 Solvent CDCl<sub>3</sub>  
 Pulse Sequence zgpg30  
 Experiment 1D  
 Number of Scans 4096  
 Acquisition Date 2011-08-12T22:00:00  
 Spectrometer Frequency 100.62  
 Spectral Width 24038.5  
 Lowest Frequency -1943.4  
 Nucleus <sup>13</sup>C  
 Acquired Size 32768  
 Spectral Size 32768

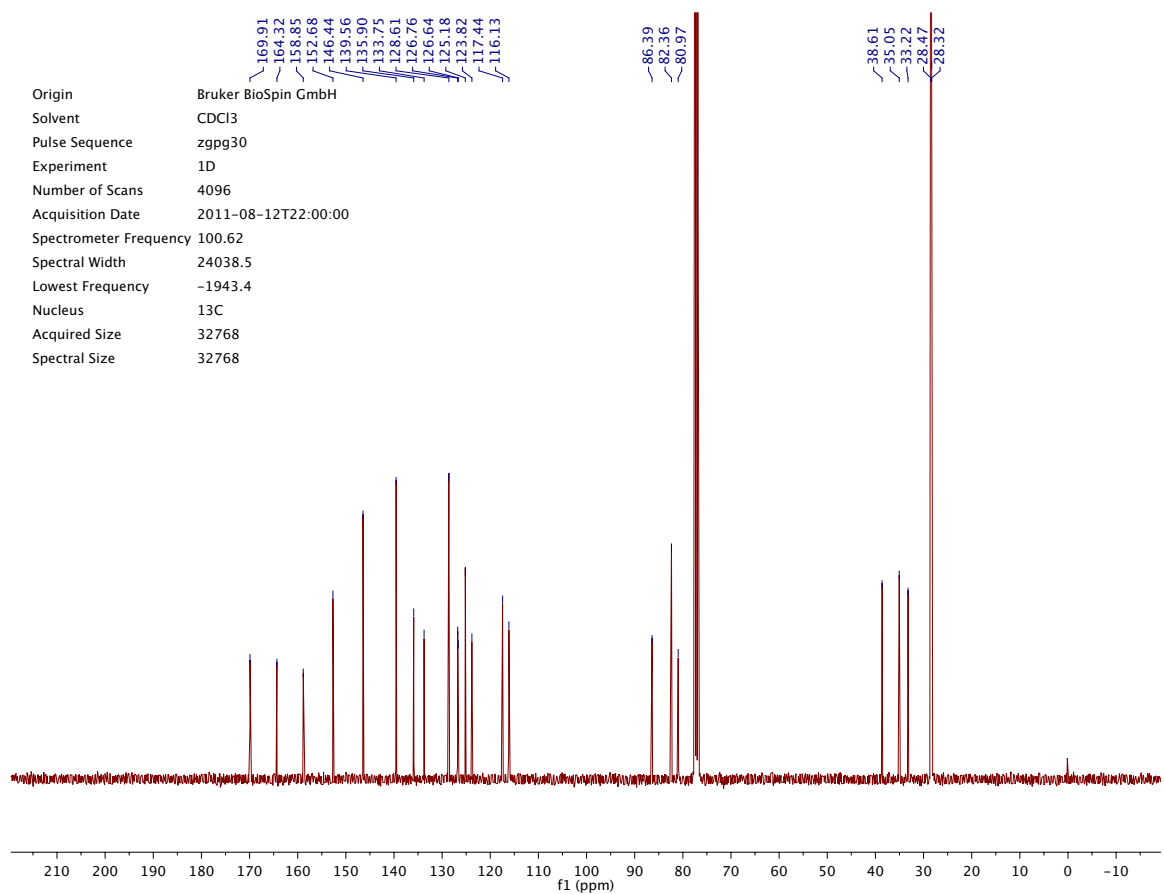

Origin Bruker BioSpin GmbH  
 Solvent CDCl3  
 Pulse Sequence zg30  
 Experiment 1D  
 Number of Scans 16  
 Acquisition Date 2011-07-20T08:36:00  
 Spectrometer Frequency 400.13  
 Spectral Width 8223.7  
 Lowest Frequency -1646.1  
 Nucleus 1H  
 Acquired Size 32768  
 Spectral Size 32768

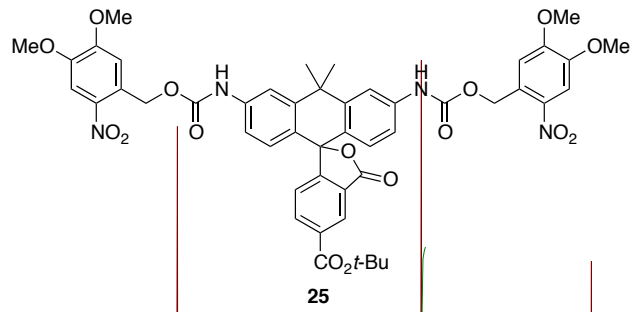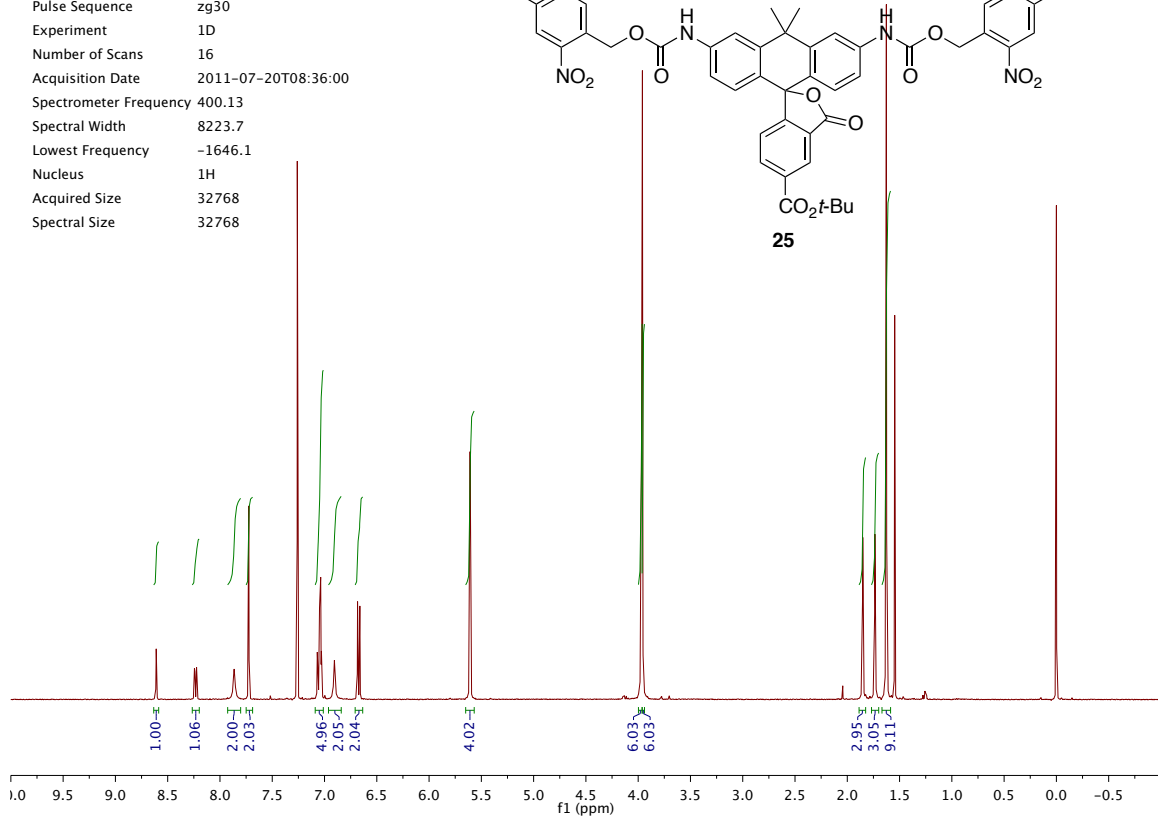

Origin Bruker BioSpin GmbH  
 Solvent CDCl3  
 Pulse Sequence zgpg30  
 Experiment 1D  
 Number of Scans 4096  
 Acquisition Date 2011-07-21T21:58:00  
 Spectrometer Frequency 100.62  
 Spectral Width 24038.5  
 Lowest Frequency -1943.9  
 Nucleus 13C  
 Acquired Size 32768  
 Spectral Size 32768

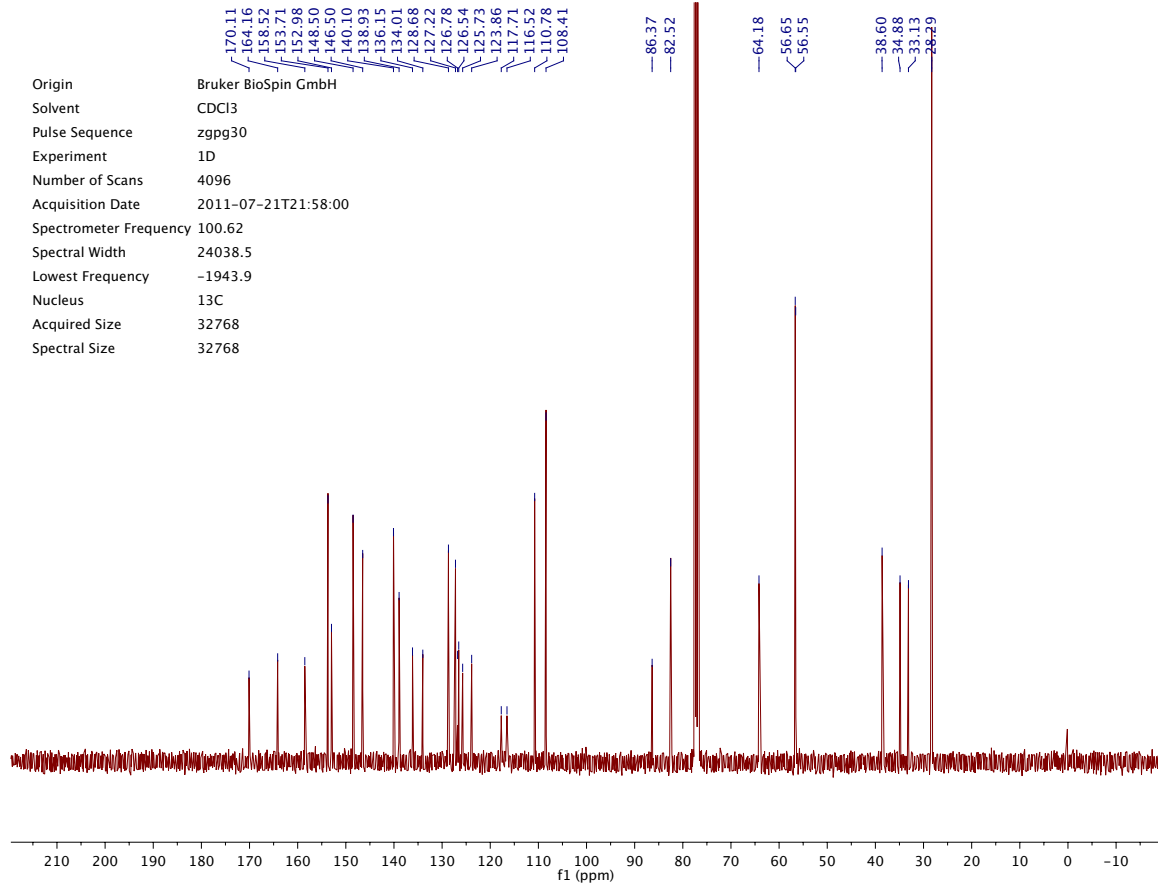

Origin Bruker BioSpin GmbH  
 Solvent CDCl3  
 Pulse Sequence zg30  
 Experiment 1D  
 Number of Scans 16  
 Acquisition Date 2011-12-28T17:48:00  
 Spectrometer Frequency 400.13  
 Spectral Width 8223.7  
 Lowest Frequency -1646.5  
 Nucleus 1H  
 Acquired Size 32768  
 Spectral Size 32768

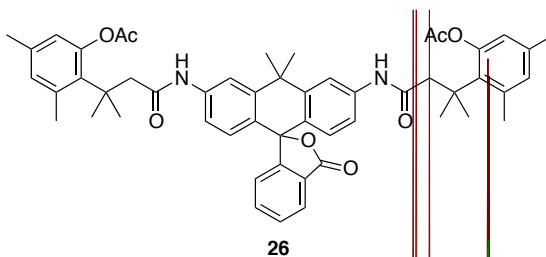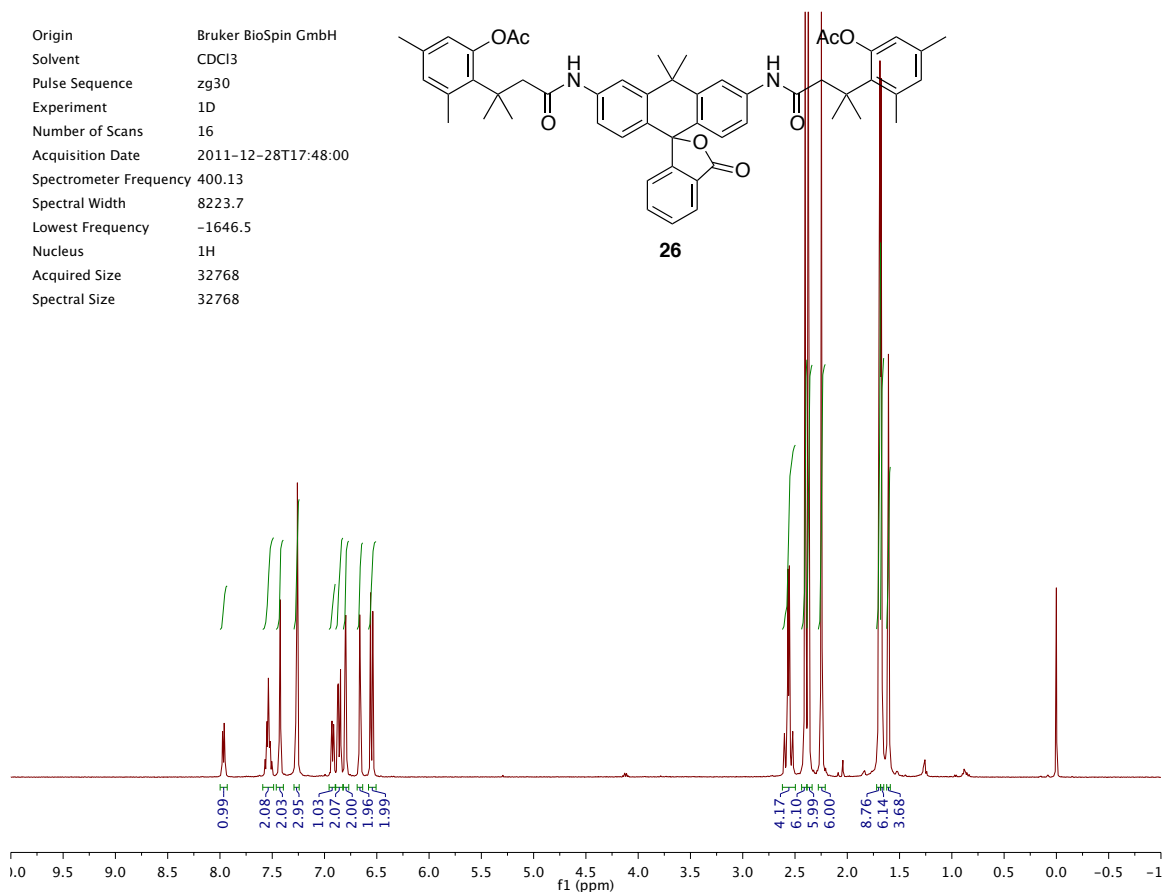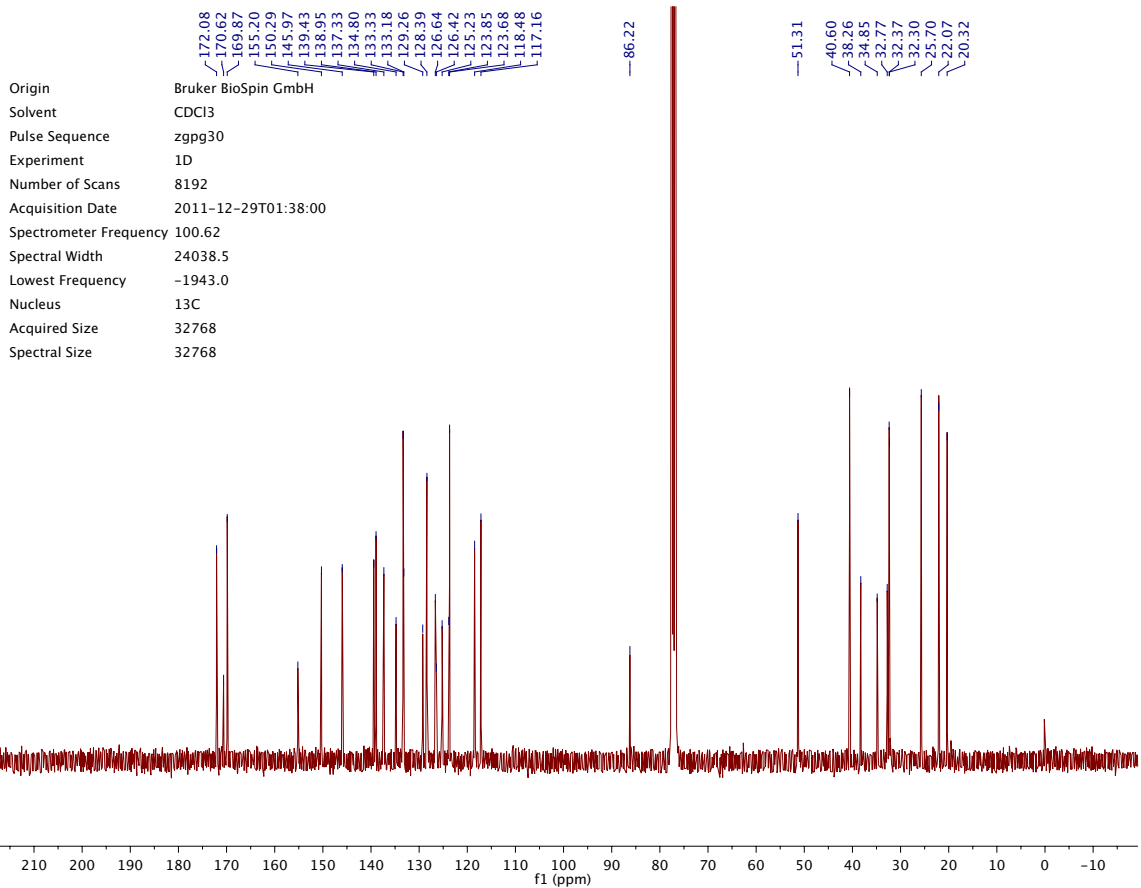

Origin Bruker BioSpin GmbH  
 Solvent CDCl3  
 Pulse Sequence zgpg30  
 Experiment 1D  
 Number of Scans 8192  
 Acquisition Date 2011-12-29T01:38:00  
 Spectrometer Frequency 100.62  
 Spectral Width 24038.5  
 Lowest Frequency -1943.0  
 Nucleus 13C  
 Acquired Size 32768  
 Spectral Size 32768

Origin Bruker BioSpin GmbH  
 Solvent CDCl3  
 Pulse Sequence zg30  
 Experiment 1D  
 Number of Scans 16  
 Acquisition Date 2012-02-15T17:11:00  
 Spectrometer Frequency 400.13  
 Spectral Width 8223.7  
 Lowest Frequency -1647.3  
 Nucleus 1H  
 Acquired Size 32768  
 Spectral Size 65536

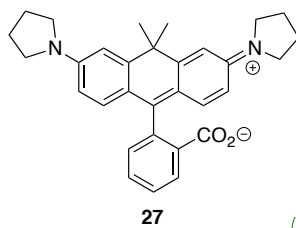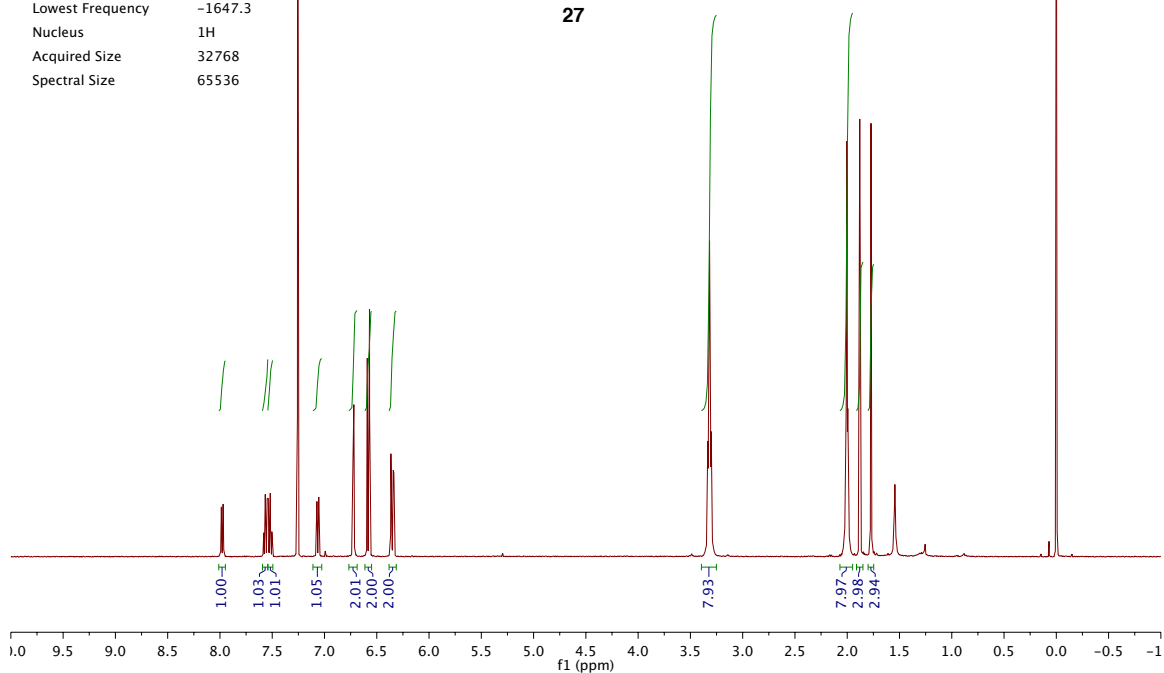

Origin Bruker BioSpin GmbH  
 Solvent CDCl3  
 Pulse Sequence zgpg30  
 Experiment 1D  
 Number of Scans 4096  
 Acquisition Date 2012-02-16T02:37:00  
 Spectrometer Frequency 100.62  
 Spectral Width 24038.5  
 Lowest Frequency -1944.8  
 Nucleus 13C  
 Acquired Size 32768  
 Spectral Size 65536

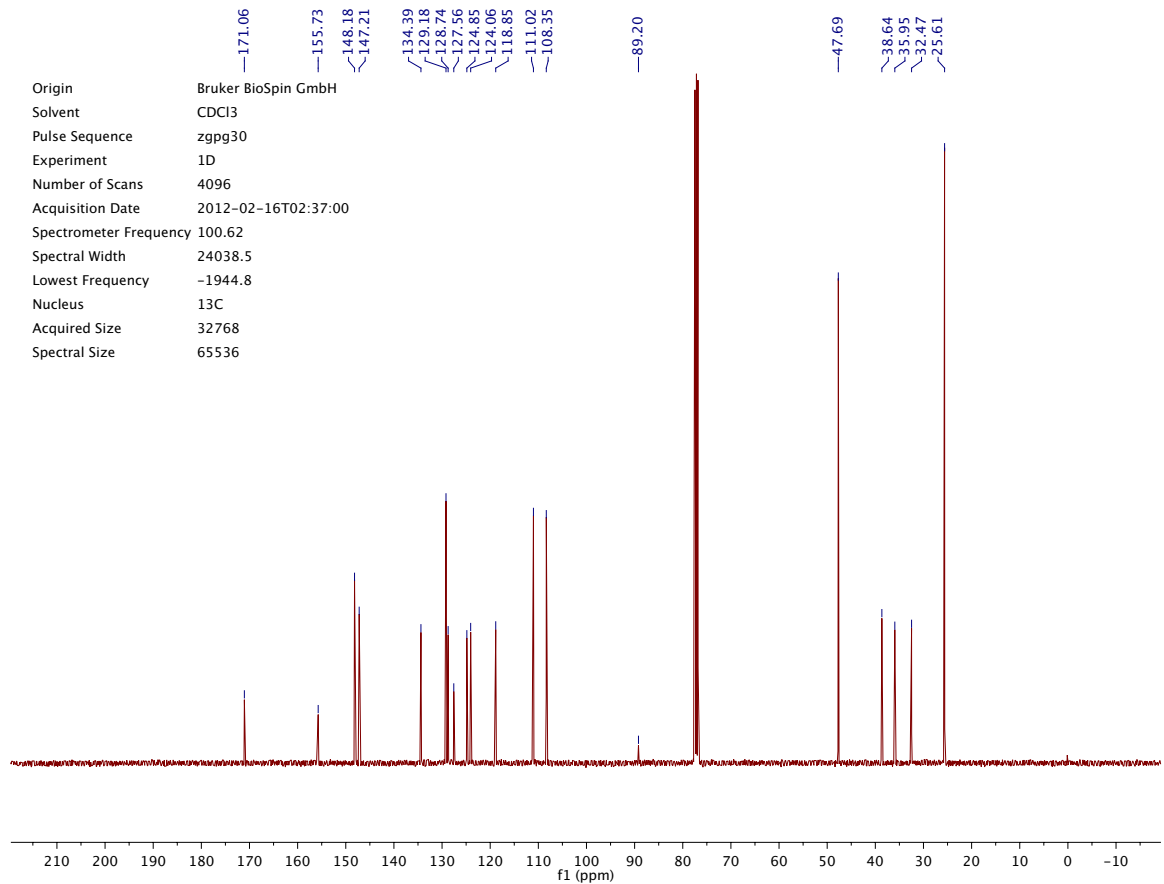

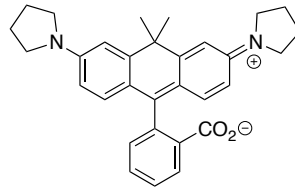

27

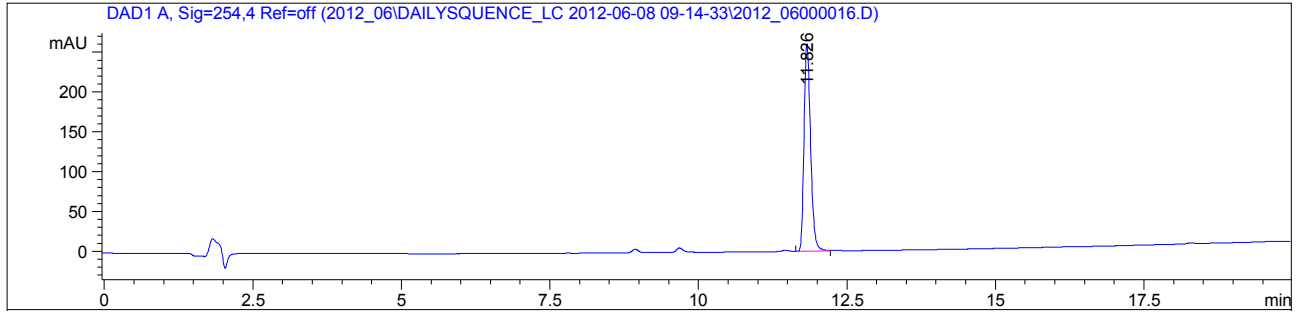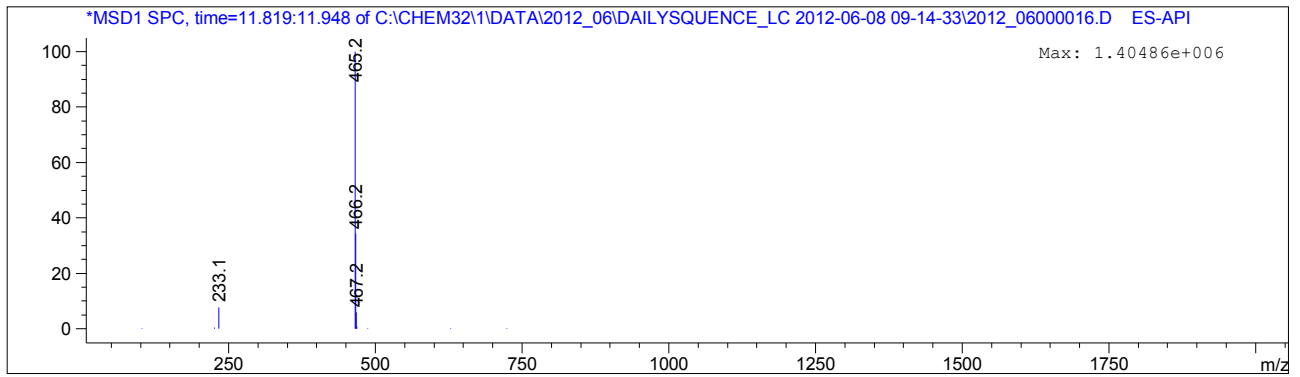



Origin Bruker BioSpin GmbH  
 Solvent CDCl<sub>3</sub>  
 Pulse Sequence zg30  
 Experiment 1D  
 Number of Scans 16  
 Acquisition Date 2012-02-14T16:27:00  
 Spectrometer Frequency 400.13  
 Spectral Width 8223.7  
 Lowest Frequency -1647.3  
 Nucleus <sup>1</sup>H  
 Acquired Size 32768  
 Spectral Size 65536

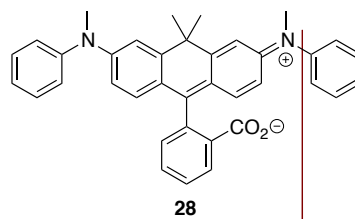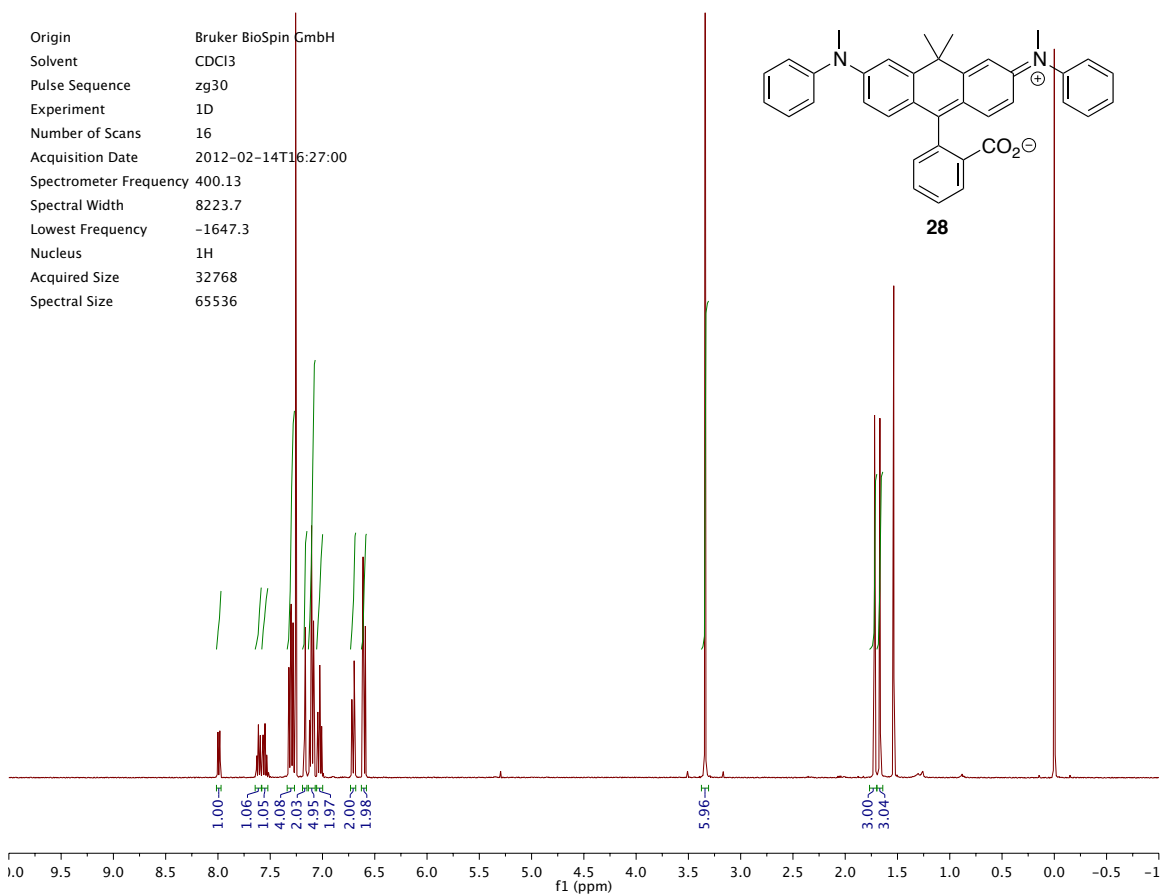

Origin Bruker BioSpin GmbH  
 Solvent CDCl<sub>3</sub>  
 Pulse Sequence zgpg30  
 Experiment 1D  
 Number of Scans 4096  
 Acquisition Date 2012-02-15T21:35:00  
 Spectrometer Frequency 100.62  
 Spectral Width 24038.5  
 Lowest Frequency -1945.4  
 Nucleus <sup>13</sup>C  
 Acquired Size 32768  
 Spectral Size 65536

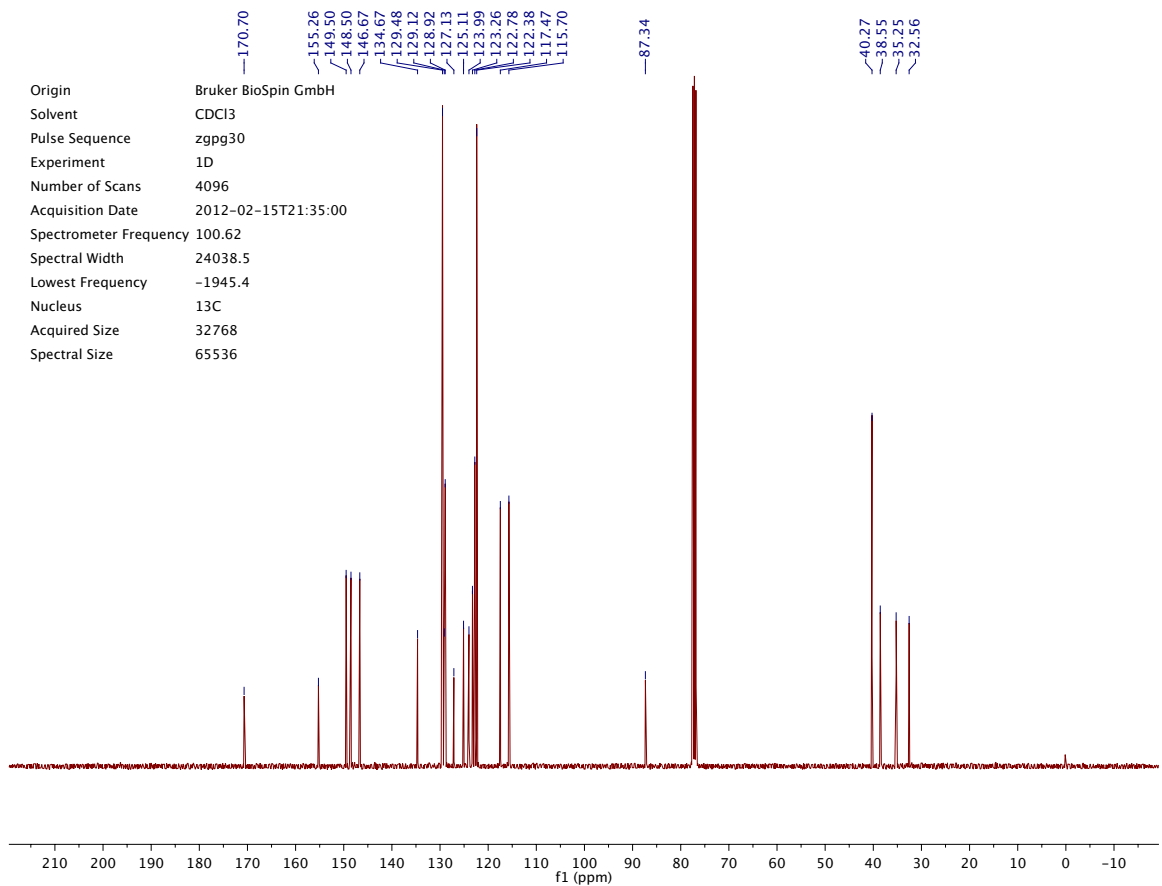

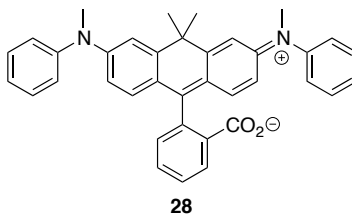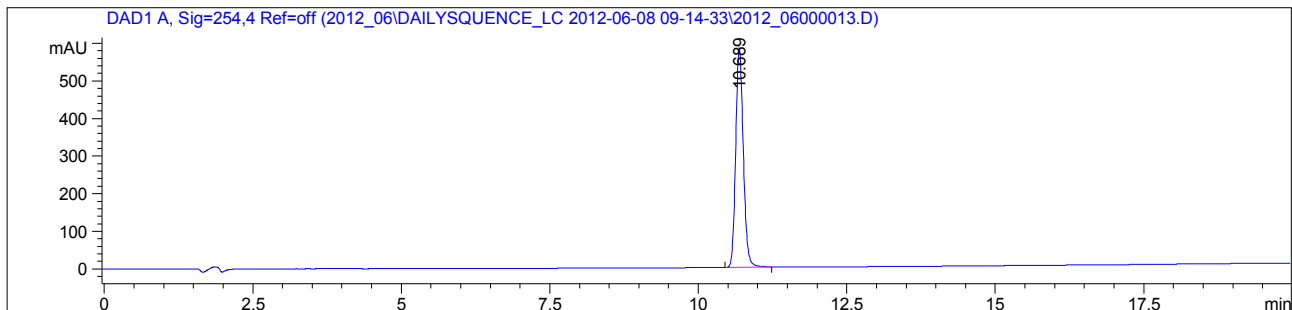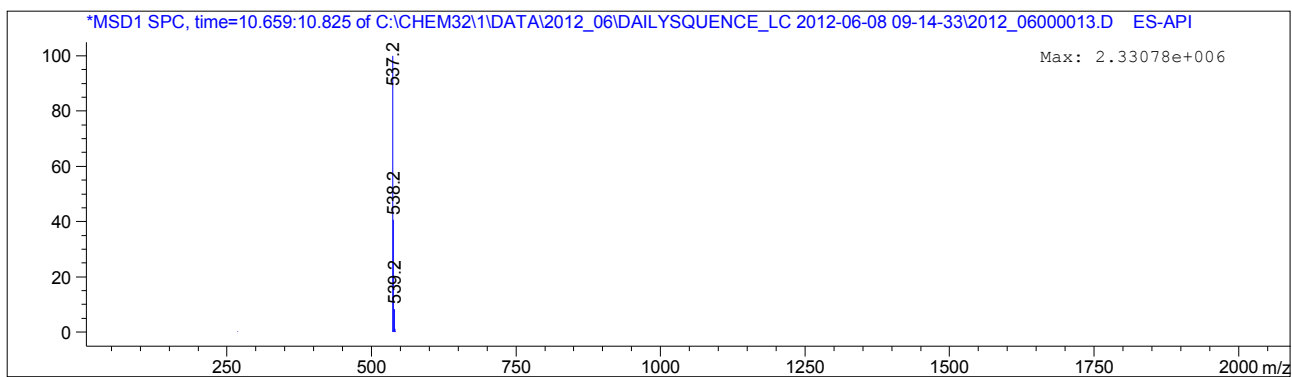

Origin Bruker BioSpin GmbH  
 Solvent MeOD  
 Pulse Sequence zg30  
 Experiment 1D  
 Number of Scans 16  
 Acquisition Date 2012-01-18T15:58:00  
 Spectrometer Frequency 400.13  
 Spectral Width 8223.7  
 Lowest Frequency -1643.8  
 Nucleus 1H  
 Acquired Size 32768  
 Spectral Size 32768

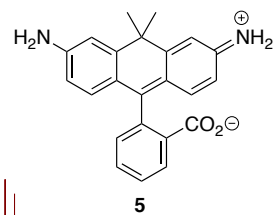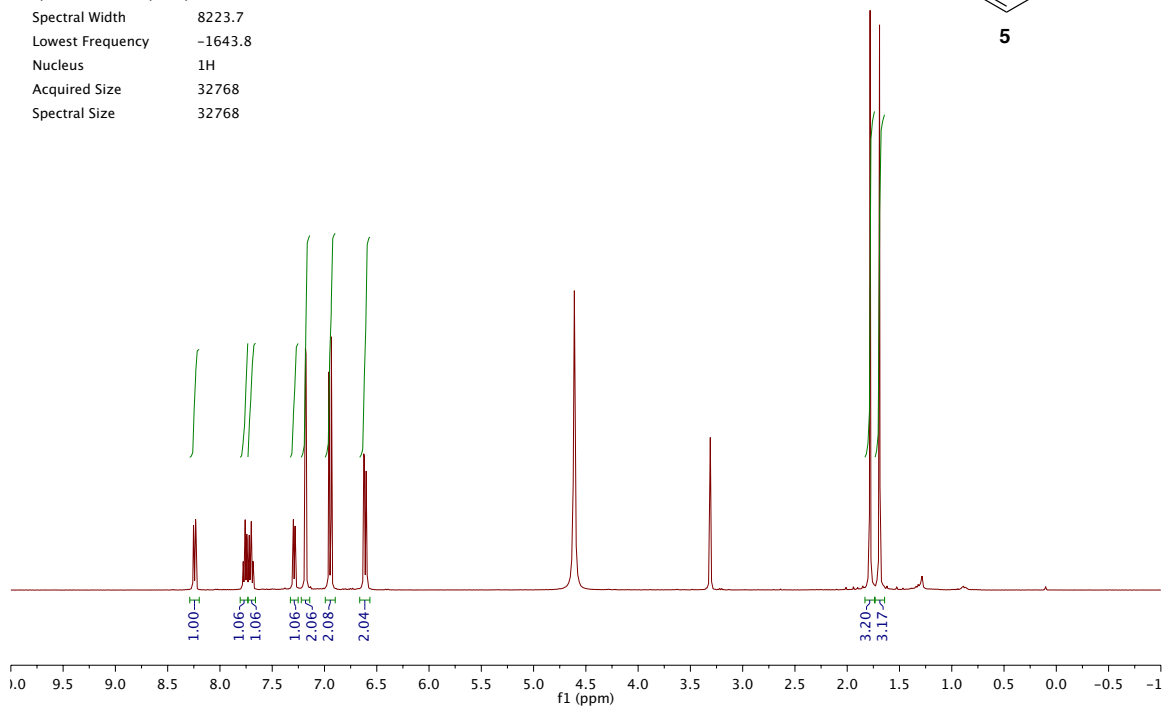

Origin Bruker BioSpin GmbH  
 Solvent MeOD  
 Pulse Sequence zgpg30  
 Experiment 1D  
 Number of Scans 8192  
 Acquisition Date 2012-01-18T23:54:00  
 Spectrometer Frequency 100.62  
 Spectral Width 24038.5  
 Lowest Frequency -1816.5  
 Nucleus 13C  
 Acquired Size 32768  
 Spectral Size 32768

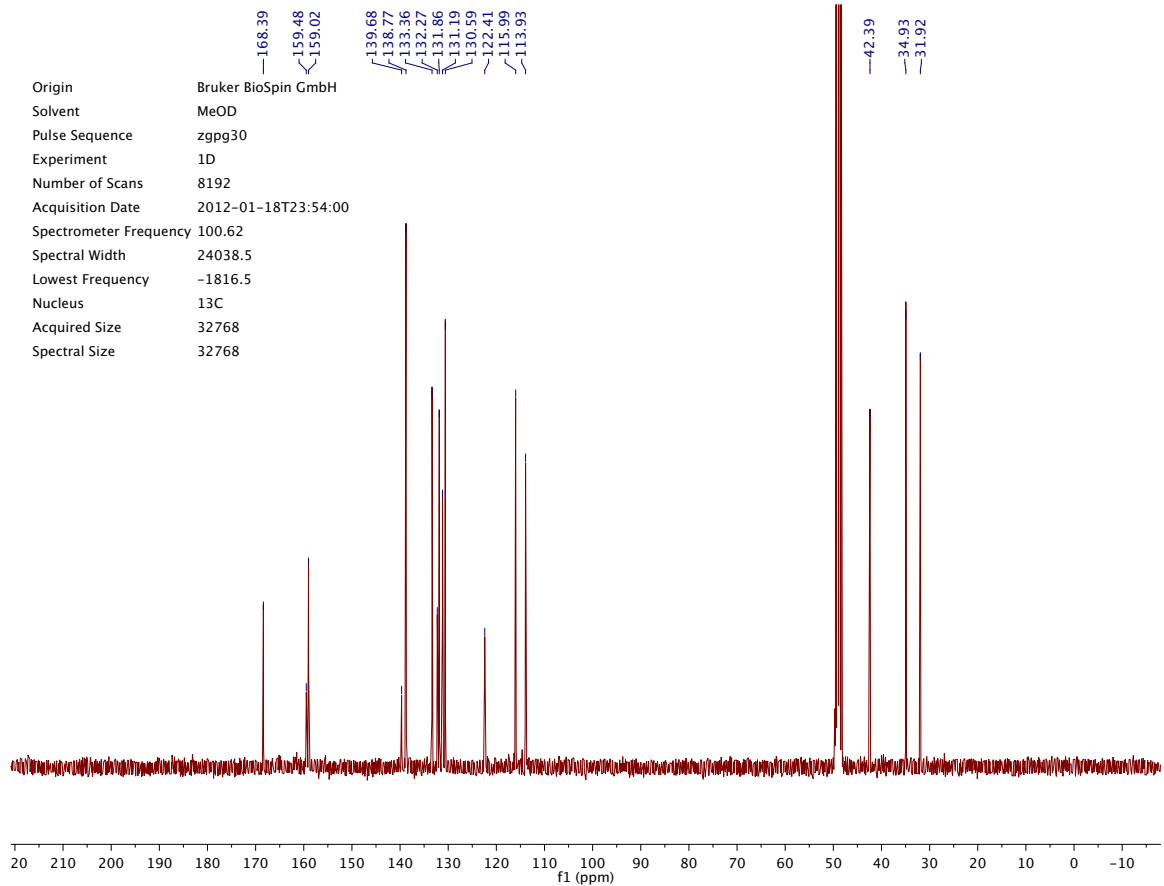

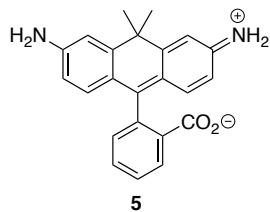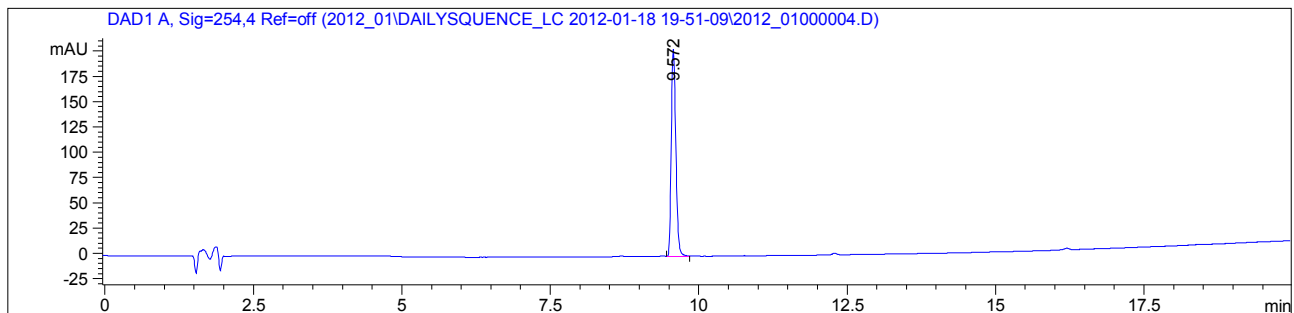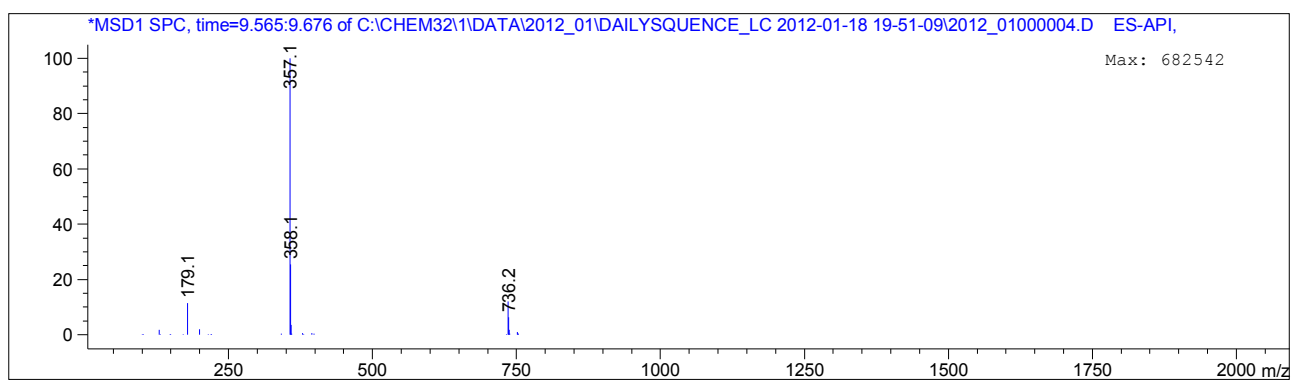

Origin Bruker BioSpin GmbH  
 Solvent MeOD  
 Pulse Sequence zg30  
 Experiment 1D  
 Number of Scans 16  
 Acquisition Date 2012-01-24T16:47:00  
 Spectrometer Frequency 400.13  
 Spectral Width 8223.7  
 Lowest Frequency -1644.0  
 Nucleus 1H  
 Acquired Size 32768  
 Spectral Size 32768

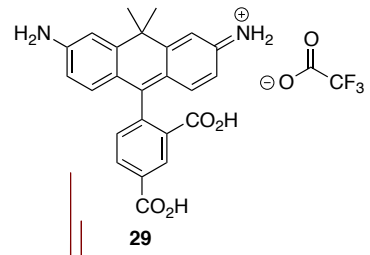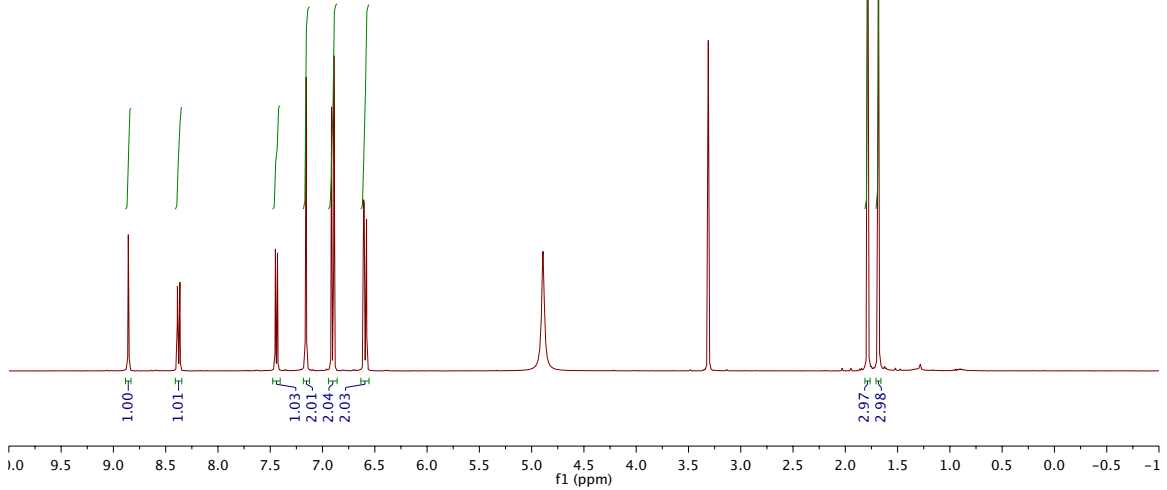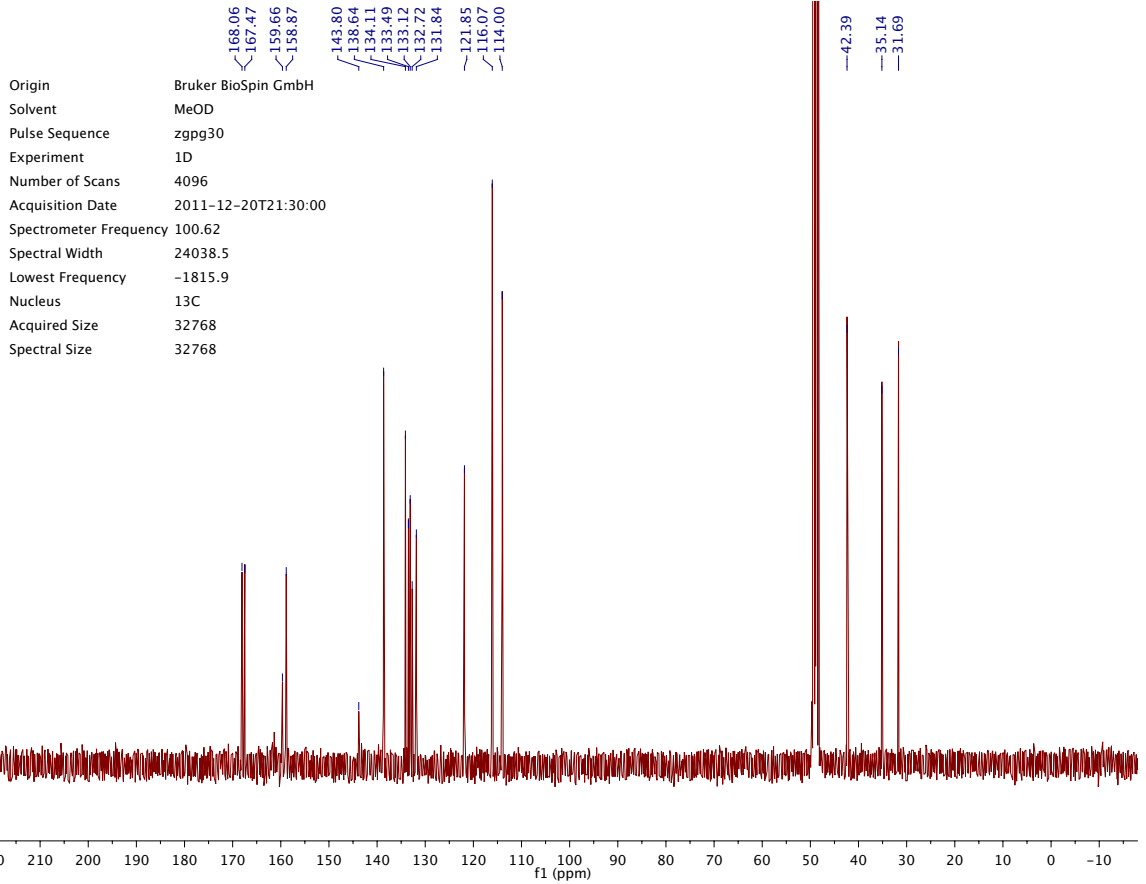

Origin Bruker BioSpin GmbH  
 Solvent MeOD  
 Pulse Sequence zgpg30  
 Experiment 1D  
 Number of Scans 4096  
 Acquisition Date 2011-12-20T21:30:00  
 Spectrometer Frequency 100.62  
 Spectral Width 24038.5  
 Lowest Frequency -1815.9  
 Nucleus 13C  
 Acquired Size 32768  
 Spectral Size 32768

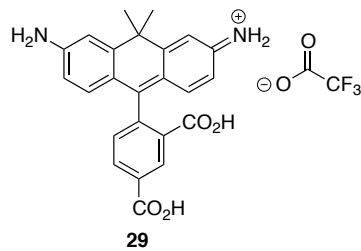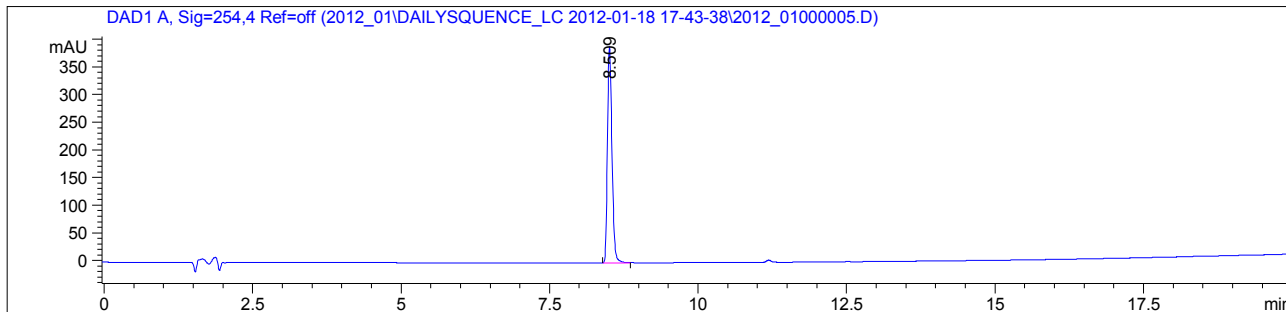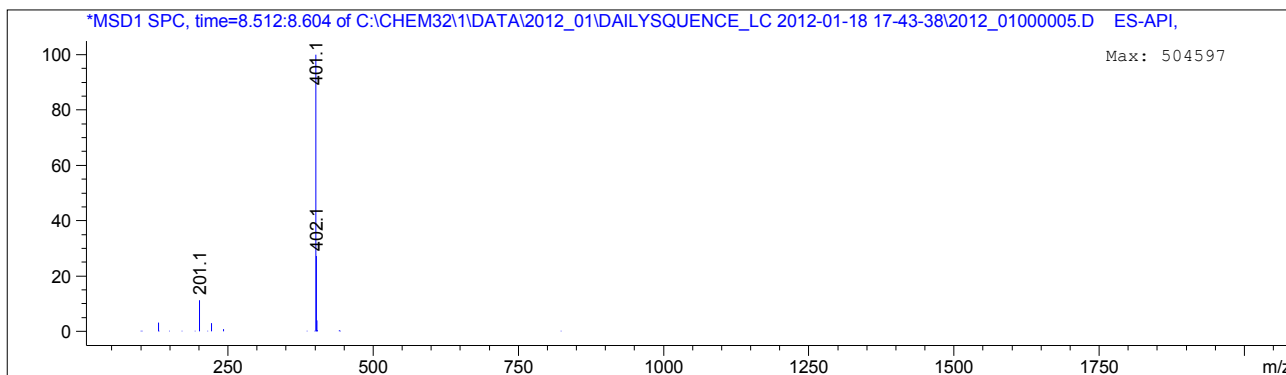

Origin Bruker BioSpin GmbH  
 Solvent DMSO  
 Pulse Sequence zg30  
 Experiment 1D  
 Number of Scans 16  
 Acquisition Date 2011-07-26T09:32:00  
 Spectrometer Frequency 400.13  
 Spectral Width 8223.7  
 Lowest Frequency -1638.5  
 Nucleus 1H  
 Acquired Size 32768  
 Spectral Size 32768

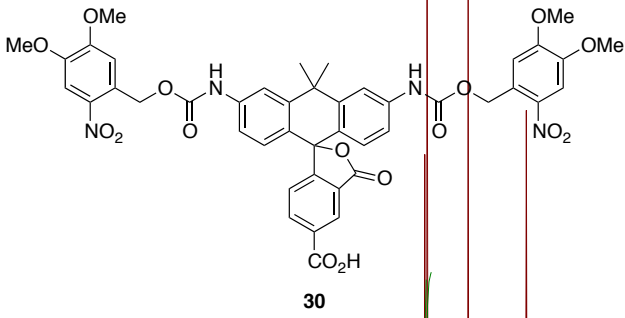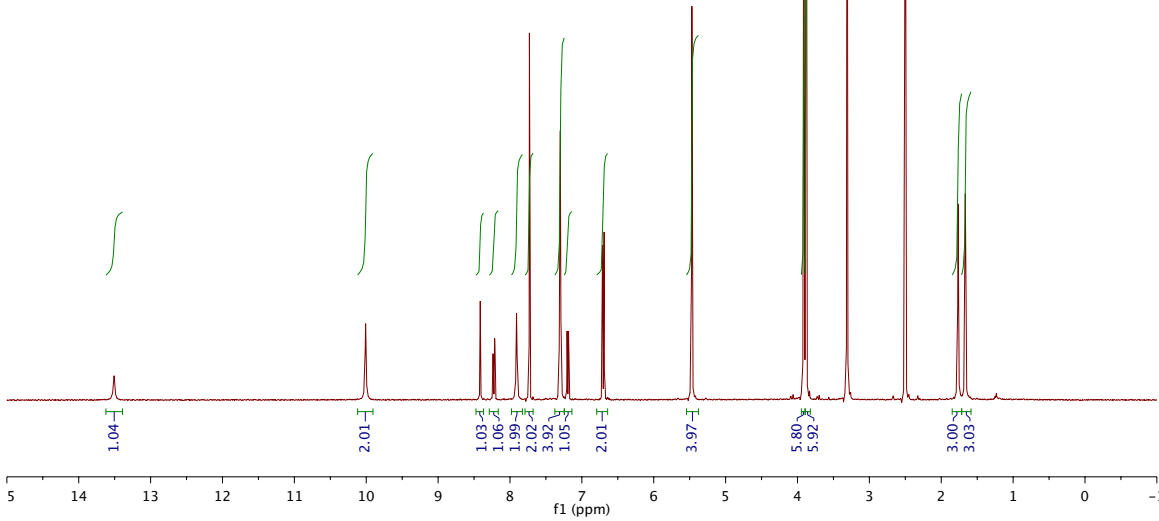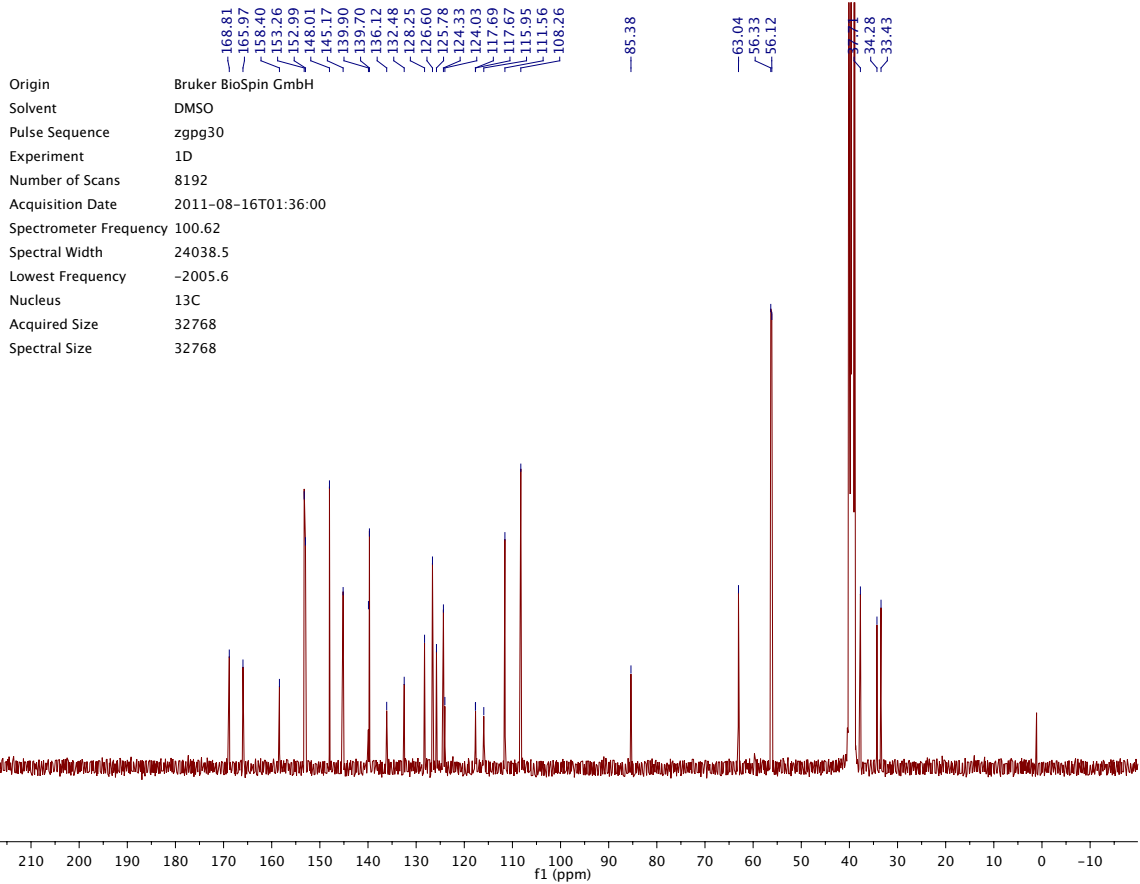

Origin Bruker BioSpin GmbH  
 Solvent DMSO  
 Pulse Sequence zgpg30  
 Experiment 1D  
 Number of Scans 8192  
 Acquisition Date 2011-08-16T01:36:00  
 Spectrometer Frequency 100.62  
 Spectral Width 24038.5  
 Lowest Frequency -2005.6  
 Nucleus 13C  
 Acquired Size 32768  
 Spectral Size 32768

Origin Bruker BioSpin GmbH  
 Solvent DMSO  
 Pulse Sequence zg30  
 Experiment 1D  
 Number of Scans 16  
 Acquisition Date 2011-12-15T15:52:00  
 Spectrometer Frequency 400.13  
 Spectral Width 8223.7  
 Lowest Frequency -1638.5  
 Nucleus 1H  
 Acquired Size 32768  
 Spectral Size 32768

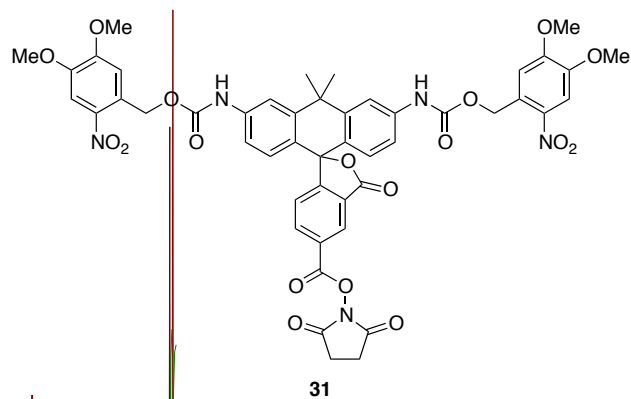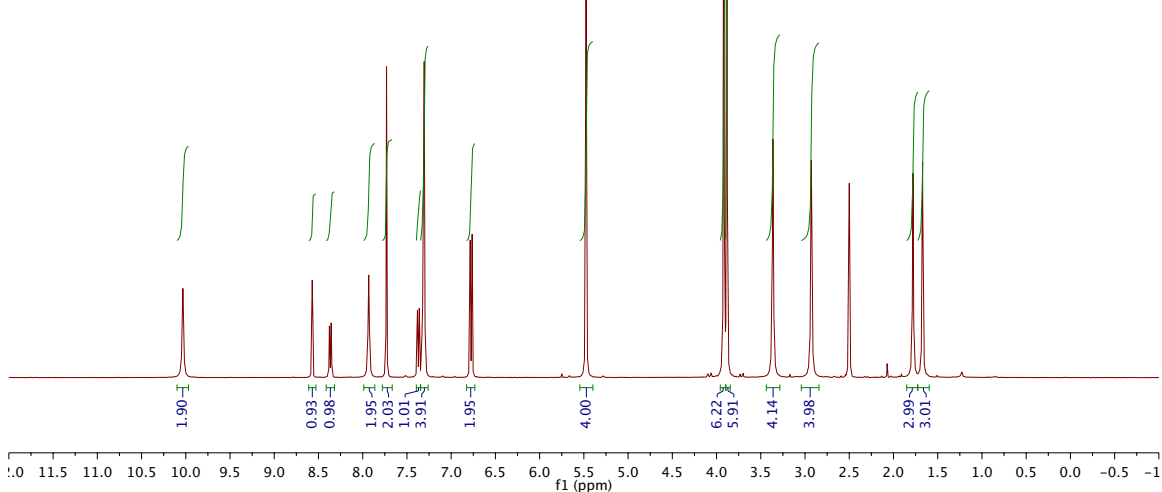

Origin Bruker BioSpin GmbH  
 Solvent DMSO  
 Pulse Sequence zgpg30  
 Experiment 1D  
 Number of Scans 8192  
 Acquisition Date 2011-12-16T01:24:00  
 Spectrometer Frequency 100.62  
 Spectral Width 24038.5  
 Lowest Frequency -2006.0  
 Nucleus 13C  
 Acquired Size 32768  
 Spectral Size 32768

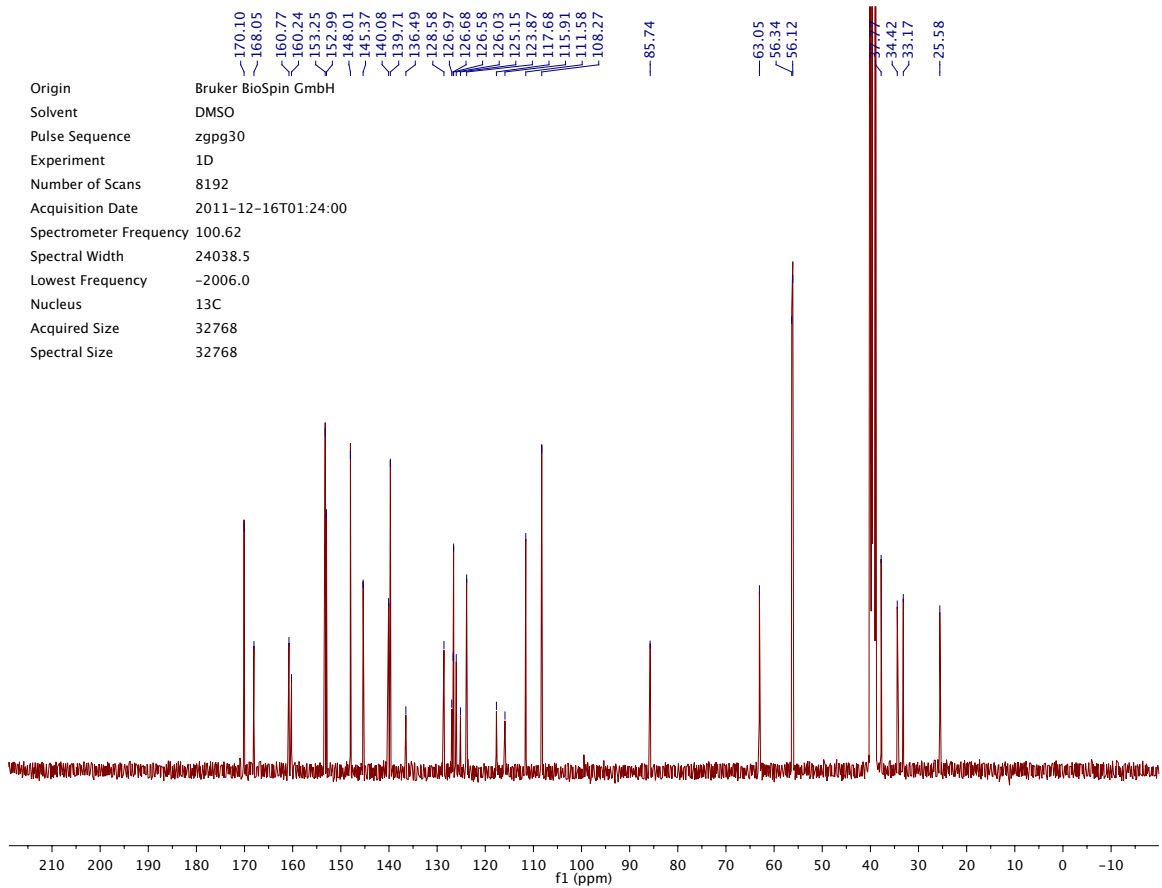



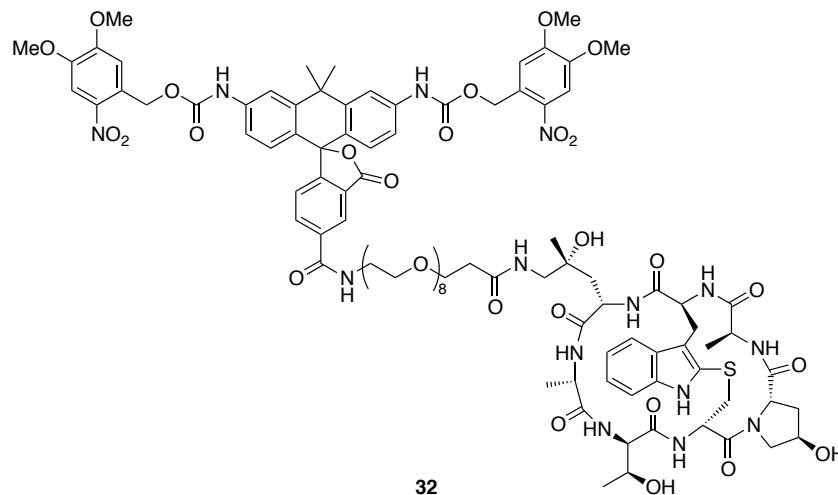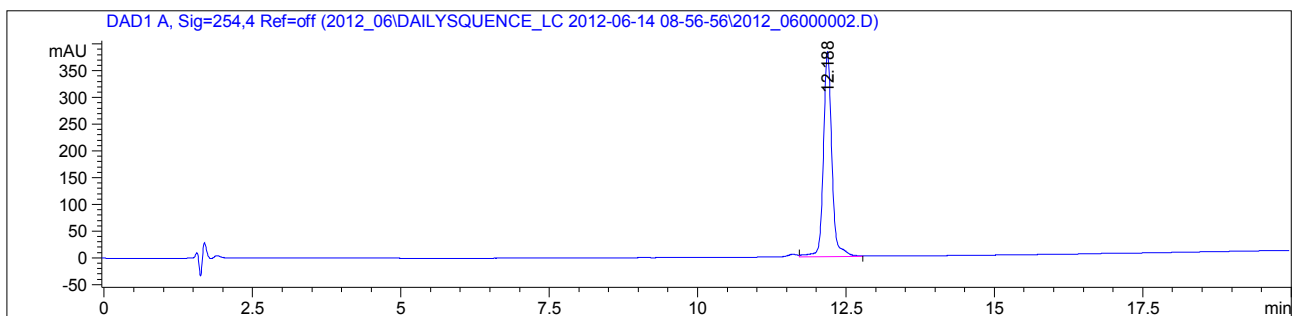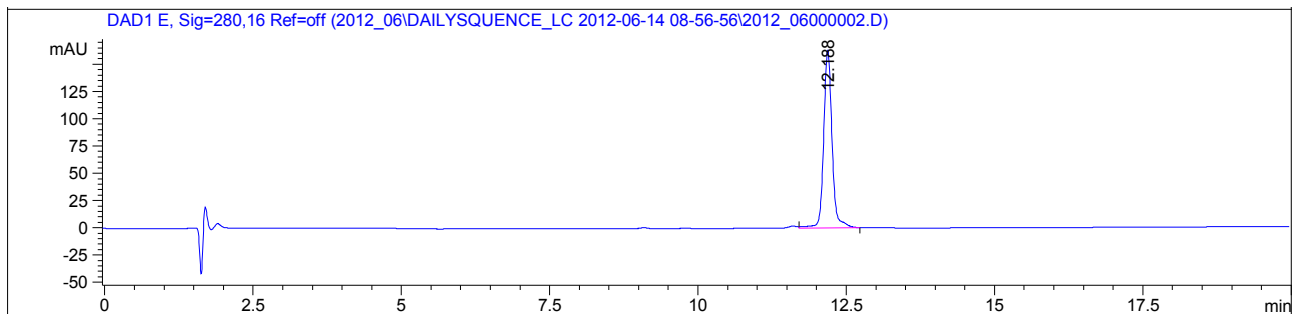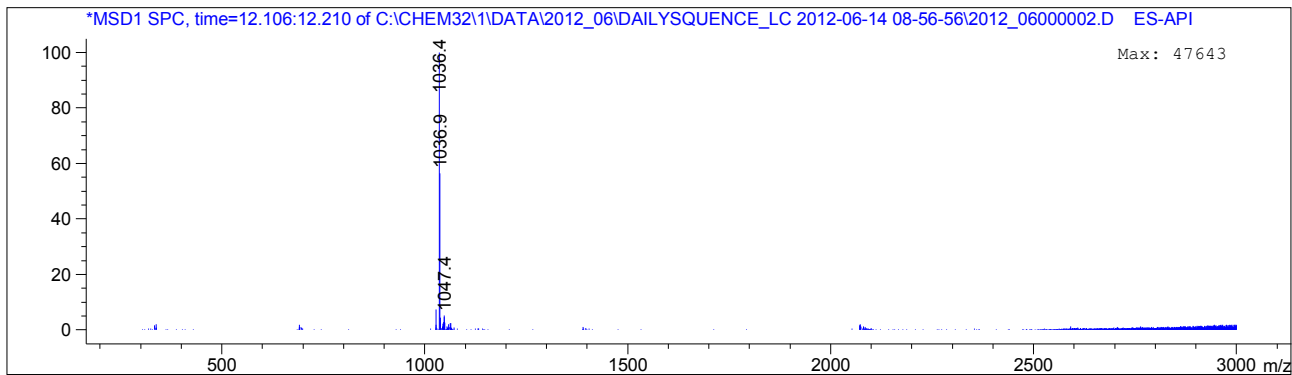

Supplement: cb4000822_si_002.pdf [file cb4000822_si_002.pdf]
